# Supplementary material
Source: Royal Society of Chemistry journal article supplement (doi:10.1039/d5dt02506k)
Supplement: d5dt02506k1.pdf [file d5dt02506k1.pdf]

## Supporting Information

### Electronic Effects of *Para*-phenolate Substitution in an Extended Series of Neutral and Oxidized Chromium Salen Nitrides

Warren VandeVen,<sup>a</sup> Samyadeb Mahato,<sup>a</sup> Avery LeComte,<sup>a</sup> Greg MacNeil,<sup>a</sup> Wen Zhou<sup>a</sup> ,  
Fabrice Thomas,<sup>b</sup> Charles J. Walsby,<sup>a</sup> Mario U. Delgado-Jaime,<sup>c</sup> Tim Storr<sup>\*a</sup>

<sup>a</sup>Department of Chemistry, Simon Fraser University, Burnaby, British Columbia, V5A 1S6, Canada. Email: [tim\\_storr@sfu.ca](mailto:tim_storr@sfu.ca)

<sup>b</sup>Department of Molecular Chemistry, University of Grenoble Alpes, CNRS, F-38000, Grenoble, France

<sup>c</sup>Department of Chemistry, University of Guadalajara, Guadalajara, Jalisco 44430, Mexico

**Table S1:** Key crystallographic information for **CrNSal<sup>NO2</sup>**, **CrNSal<sup>H</sup>**, **CrNSal<sup>OMe</sup>** and **CrNSal<sup>OiPr</sup>**.

| Complex                    | CrNSal <sup>NO2</sup>                                           | CrNSal <sup>H</sup>                                             | CrNSal <sup>OMe</sup>                                           | CrNSal <sup>OiPr</sup>                                          |
|----------------------------|-----------------------------------------------------------------|-----------------------------------------------------------------|-----------------------------------------------------------------|-----------------------------------------------------------------|
| Formula                    | C <sub>28</sub> H <sub>34</sub> CrN <sub>5</sub> O <sub>6</sub> | C <sub>28</sub> H <sub>36</sub> CrN <sub>3</sub> O <sub>2</sub> | C <sub>30</sub> H <sub>40</sub> CrN <sub>3</sub> O <sub>4</sub> | C <sub>34</sub> H <sub>48</sub> CrN <sub>3</sub> O <sub>4</sub> |
| Formula weight             | 588.61                                                          | 498.61                                                          | 558.66                                                          | 614.77                                                          |
| Space group                | P 1 21/c 1                                                      | P 1 21/n 1                                                      | P-1                                                             | I 2                                                             |
| <i>a</i> (Å)               | 11.34(5)                                                        | 13.14(3)                                                        | 11.19(1)                                                        | 14.90(7)                                                        |
| <i>b</i> (Å)               | 23.91(4)                                                        | 12.80(5)                                                        | 11.40(5)                                                        | 13.44(0)                                                        |
| <i>c</i> (Å)               | 10.82(5)                                                        | 15.45(5)                                                        | 13.41(1)                                                        | 21.26(4)                                                        |
| α (deg)                    | 90                                                              | 90                                                              | 87.71(6)                                                        | 90                                                              |
| β (deg)                    | 104.66(1)                                                       | 99.91(5)                                                        | 69.85(6)                                                        | 99.15(5)                                                        |
| γ (deg)                    | 90                                                              | 90                                                              | 82.00(9)                                                        | 90                                                              |
| <i>V</i> (Å <sup>3</sup> ) | 2841.17(17)                                                     | 2562.20(8)                                                      | 1591.3(2)                                                       | 4206.0(4)                                                       |
| Z                          | 4                                                               | 33                                                              | 2                                                               | 2                                                               |

|                                                               |         |         |         |         |
|---------------------------------------------------------------|---------|---------|---------|---------|
| T (K)                                                         | 296     | 296     | 296     | 210     |
| $\rho_{\text{calcd}}$ (g cm <sup>-3</sup> )                   | 1.376   | 1.293   | 1.252   | 1.142   |
| $\lambda$ (Å)                                                 | 1.54178 | 1.54178 | 1.54178 | 0.71073 |
| $\mu$ (cm <sup>-1</sup> )                                     | 3.735   | 3.898   | 3.282   | 0.315   |
| R indices <sup>a</sup> with<br>I > 2.0 $\sigma$ (I)<br>(data) | 0.0604  | 0.0318  | 0.0491  | 0.0831  |
| $wR_2$                                                        | 0.1472  | 0.0924  | 0.1449  | 0.2707  |
| $R_1$                                                         | 0.0604  | 0.0318  | 0.0491  | 0.0831  |
| Goodness-of-fit<br>on F <sup>2</sup>                          | 1.053   | 1.046   | 1.094   | 1.100   |

**Table S2:** Key metrical parameters including distances (Å) and angles (°) for **CrNSal<sup>NO2</sup>**, **CrNSal<sup>H</sup>**, **CrNSal<sup>OMe</sup>** and **CrNSal<sup>OiPr</sup>**.

| Parameter         | CrNSal <sup>NO2</sup> | CrNSal <sup>H</sup> | CrNSal <sup>OMe</sup> | CrNSal <sup>OiPr</sup> |
|-------------------|-----------------------|---------------------|-----------------------|------------------------|
| Cr(1)--O1         | 1.910(2)              | 1.896(1)            | 1.907(3)              | 1.839(6)               |
| Cr(1)--O(2)       | 1.906(2)              | 1.915(1)            | 1.911(3)              | 1.823(6)               |
| Cr(1)--N(1)       | 2.015(3)              | 2.008(1)            | 2.010(3)              | 2.036(6)               |
| Cr(1)--N(2)       | 2.002(3)              | 2.031(1)            | 2.006(5)              | 2.051(6)               |
| Cr(1)--N(3)       | 1.560(4)              | 1.549(2)            | 1.556(5)              | 1.538(1)               |
| O(1)--C(1)        | 1.314(4)              | 1.317(2)            | 1.317(5)              | 1.340(9)               |
| O(2)--C(2)        | 1.314(4)              | 1.316(2)            | 1.318(6)              | 1.340(9)               |
| O(1)--Cr(1)--O(2) | 89.1(5)               | 87.8(1)             | 89.5(1)               | 92.0(2)                |
| O(1)--Cr(1)--N(1) | 88.0(6)               | 88.3(5)             | 88.6(3)               | 89.9(6)                |
| O(1)--Cr(1)--N(2) | 152.4(4)              | 141.5(8)            | 147.0(8)              | 153.5(5)               |
| O(1)--Cr(1)--N(3) | 104.8(7)              | 111.9(3)            | 108.9(8)              | 101.3(8)               |
| O(2)--Cr(1)--N(2) | 89.2(7)               | 88.7(7)             | 86.7(6)               | 89.9(8)                |
| O(2)--Cr(1)--N(1) | 149.3(9)              | 156.4(7)            | 152.7(4)              | 157.8(6)               |
| O(2)--Cr(1)--N(3) | 107.6(8)              | 104.5(7)            | 105.0(4)              | 98.5(0)                |

|                                 |          |          |          |          |
|---------------------------------|----------|----------|----------|----------|
| N(1)--Cr(1)--N(2)               | 79.5(0)  | 79.9(7)  | 80.2(2)  | 78.7(5)  |
| N(1)--Cr(1)--N(3)               | 102.4(7) | 98.3(8)  | 101.2(1) | 102.7(1) |
| N(2)--Cr(1)--N(3)               | 101.8(0) | 105.9(7) | 103.5(5) | 104.3(9) |
| $\tau_5$ parameter[1]           | 0.05     | 0.25     | 0.03     | 0.13     |
| Cr -Sal <sup>R</sup> mean plane | 0.48     | 0.52     | 0.50     | 0.46     |

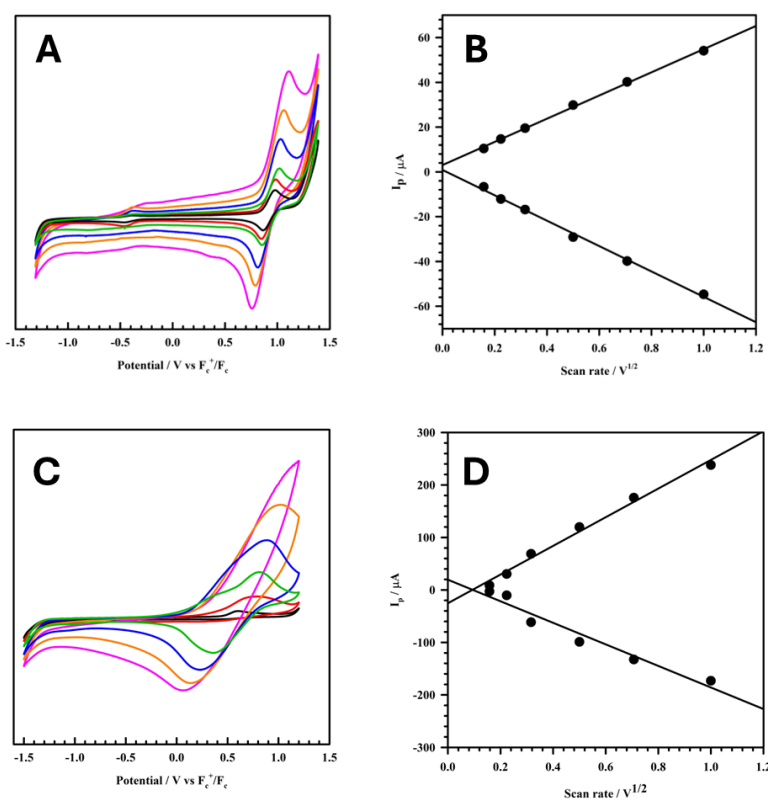

**Figure S1:** Scan rate dependence for A) CrNSal<sup>NO2</sup>, C) CrNSal<sup>H</sup>. Conditions: 0.1 M TBAP; CH<sub>2</sub>Cl<sub>2</sub>; 1 mM complex; T = 298 K; Scan rate 25 mV/s (black), 50 mV/s (red), 100 mV/s (green), 250 mV/s (blue), 500 mV/s (orange), 1000 mV/s (purple). Randles–Sevcik plots for B) CrNSal<sup>NO2</sup> and D) CrNSal<sup>H</sup> obtained from the cyclic voltammetry.

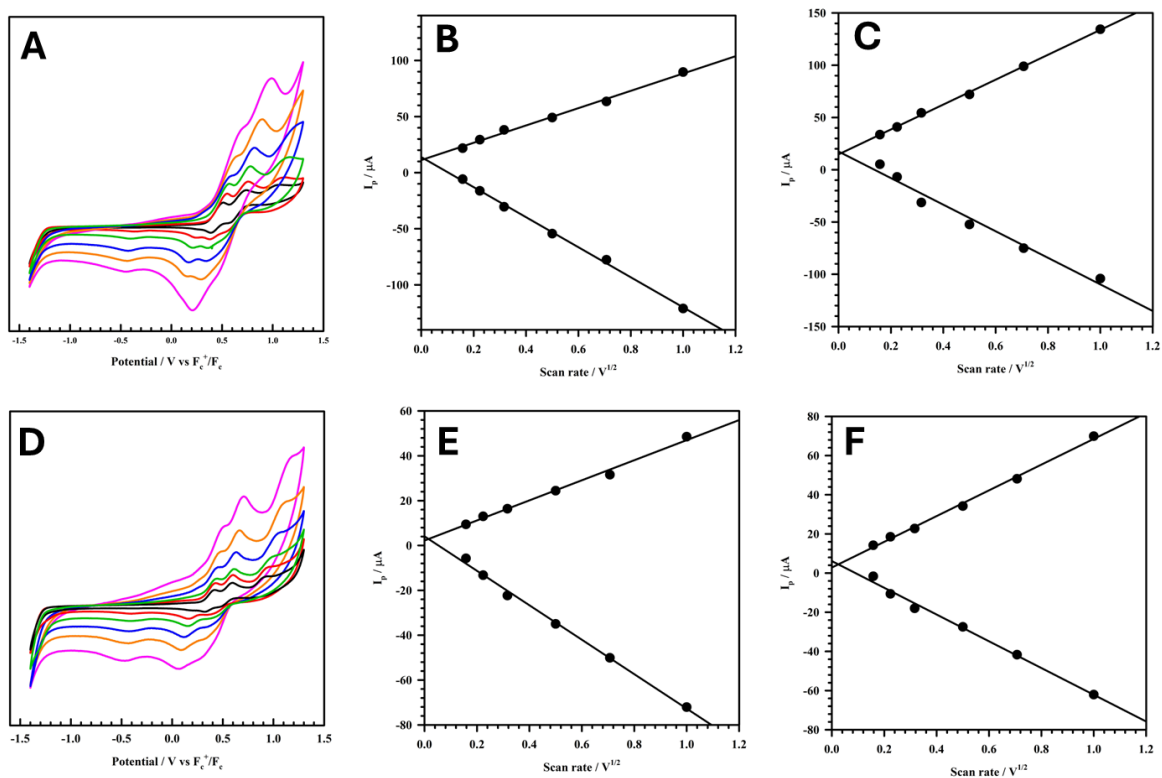

**Figure S2:** Scan rate dependence for A)  $\text{CrNSal}^{\text{OMe}}$ , D)  $\text{CrNSal}^{\text{OiPr}}$ . Conditions: 0.1 M TBAP;  $\text{CH}_2\text{Cl}_2$ ; 1 mM complex;  $T = 298 \text{ K}$ ; Scan rate 25 mV/s (black), 50 mV/s (red), 100 mV/s (green), 250 mV/s (blue), 500 mV/s (orange), 1000 mV/s (purple). Randles–Sevcik plots for  $\text{CrNSal}^{\text{OMe}}$  (B and C)  $\text{CrNSal}^{\text{H}}$  obtained from the cyclic voltammetry.

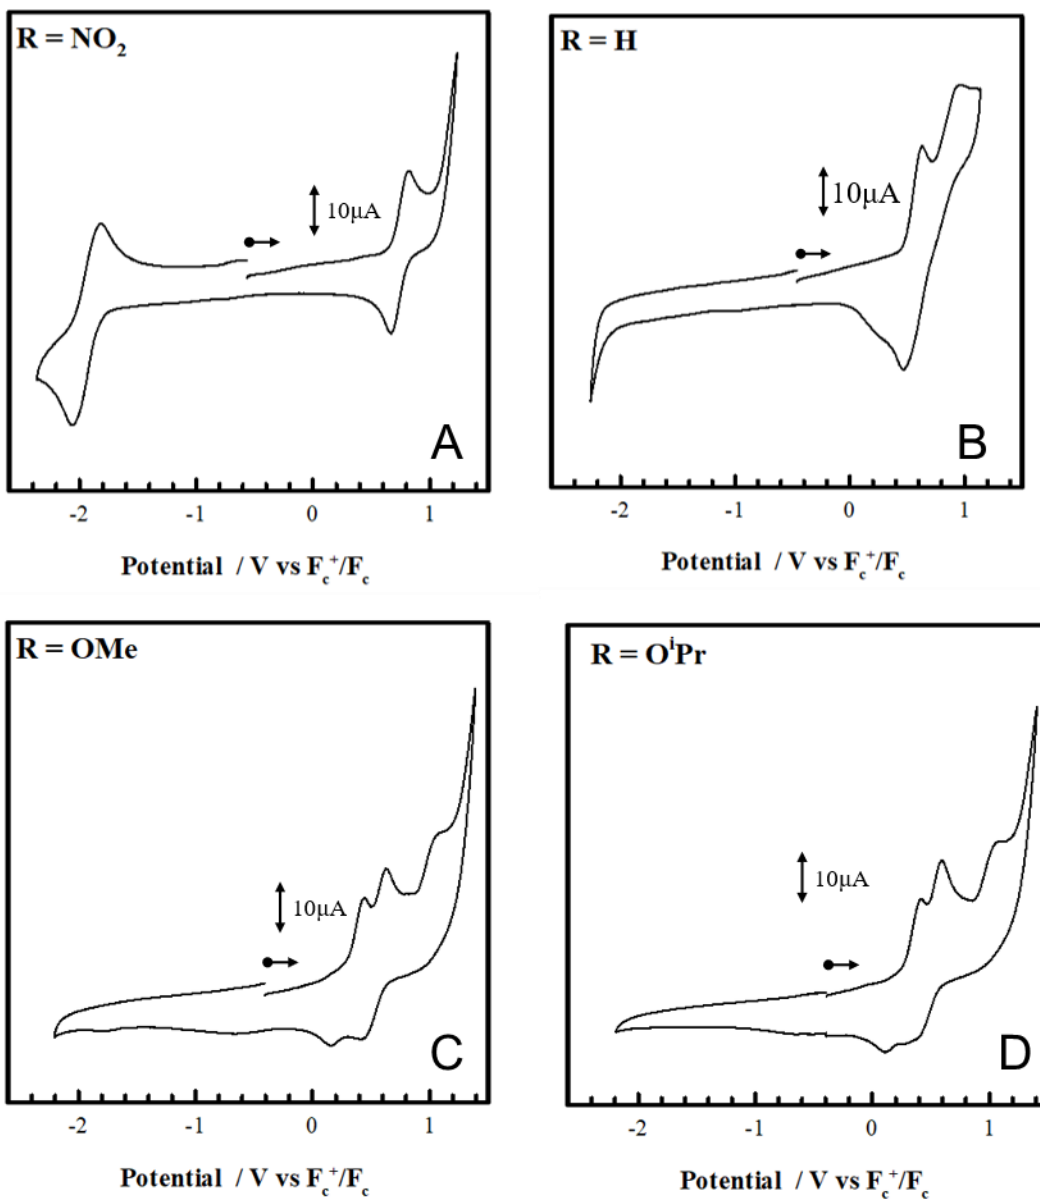

**Figure S3:** Full scan window cyclic voltammogram for A)  $\text{CrNSal}^{\text{NO}_2}$ , B)  $\text{CrNSal}^{\text{H}}$ , C)  $\text{CrNSal}^{\text{OMe}}$ , D)  $\text{CrNSal}^{\text{OiPr}}$ . Conditions: 0.1 M TBAP;  $\text{CH}_2\text{Cl}_2$ ; 1 mM complex;  $T = 298 \text{ K}$ ; scan rate = 100 mV/s.

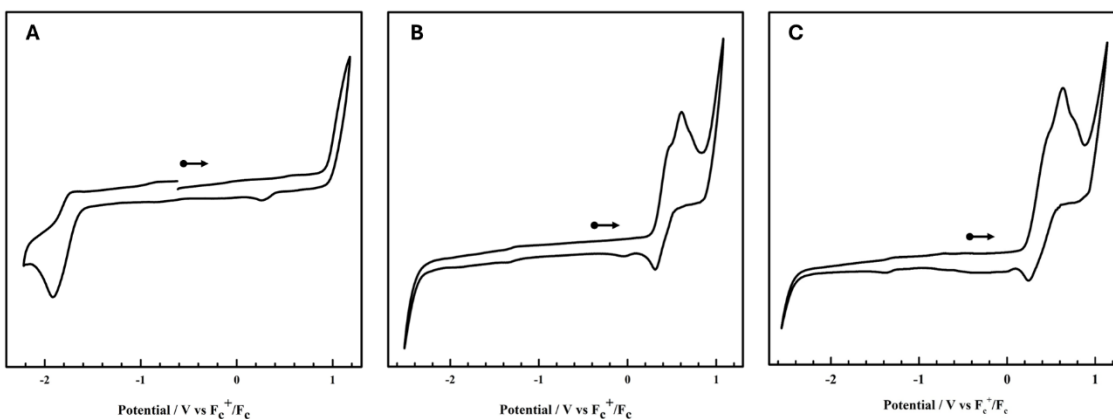

**Figure S4:** Full scan window cyclic voltammogram for A)  $\text{H}_2\text{Sal}^{\text{NO}_2}$ , B)  $\text{H}_2\text{Sal}^{\text{OMe}}$ , C)  $\text{H}_2\text{Sal}^{\text{OiPr}}$ . Conditions: 0.1 M TBAP;  $\text{CH}_2\text{Cl}_2$ ; 1 mM complex;  $T = 298 \text{ K}$ ; scan rate = 100 mV/s.

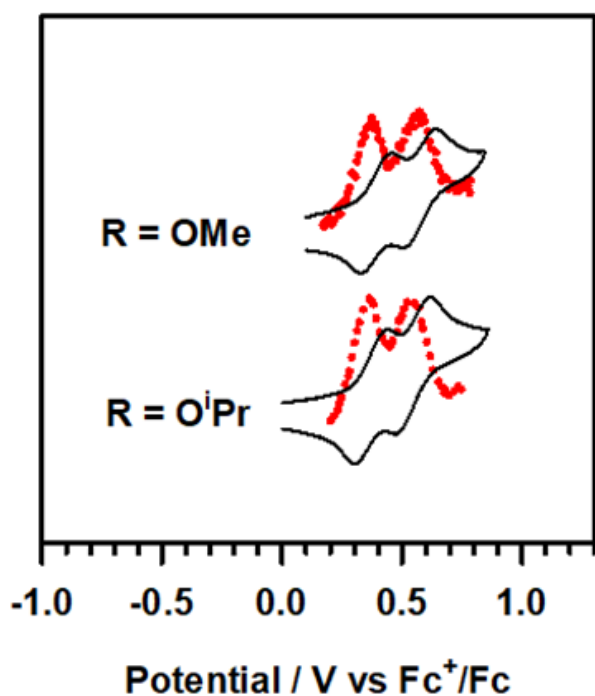

**Figure S5:** Stacked plots of cyclic voltammograms (black) and differential pulse voltammograms (red) for  $\text{CrNSal}^{\text{OMe}}$  and  $\text{CrNSal}^{\text{OiPr}}$ . Conditions: 0.1 M TBAP;  $\text{CH}_2\text{Cl}_2$ ; 1 mM complex;  $T = 298 \text{ K}$ ; scan rate = 100 mV/s (CV).

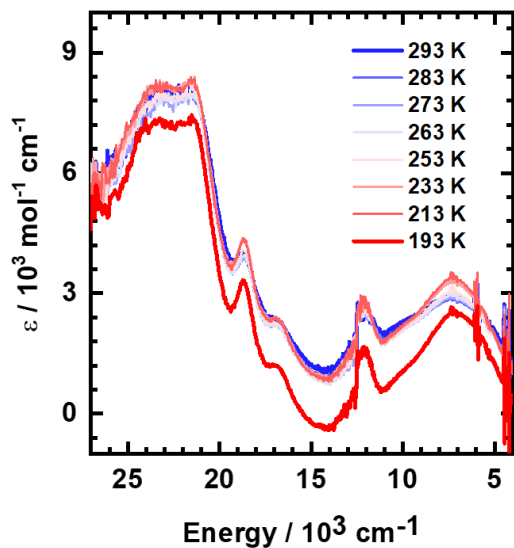

**Figure S6:** Variable temperature (VT) UV-vis-NIR spectra for oxidized  $[\text{CrNSal}^{\text{O}i\text{Pr}}]^+$  derivative. Conditions: 0.45 mM;  $\text{CH}_2\text{Cl}_2$ . Note: Baseline is not corrected.

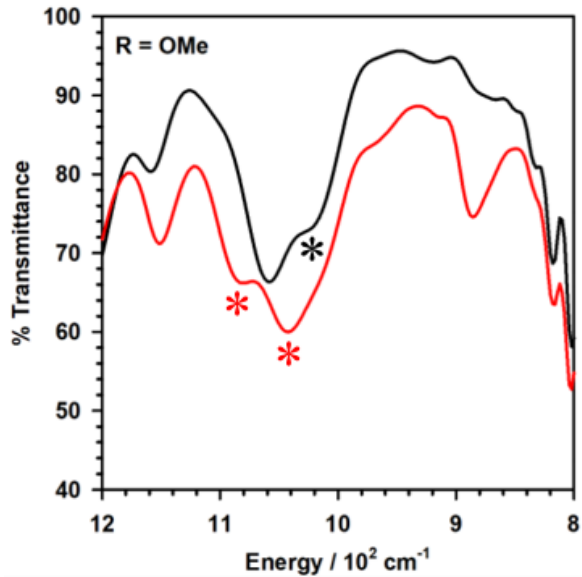

**Figure S7:** Solution IR spectra for neutral (black) and chemically oxidized with magic green (red) for  $\text{CrNSal}^{\text{OMe}}$ . \* –  $\nu(\text{Cr}\equiv\text{N})$ . Conditions: 5 mM complex;  $T = 298 \text{ K}$ ;  $\text{CH}_2\text{Cl}_2$ .

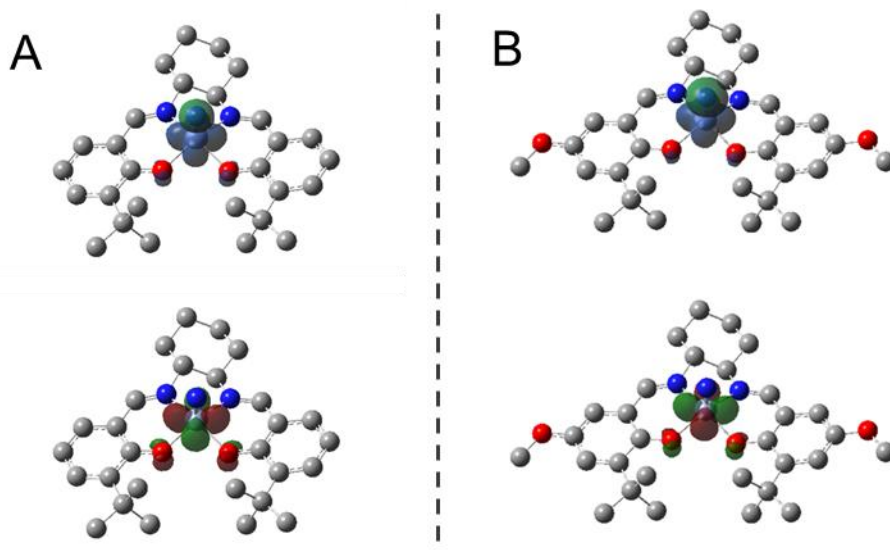

**Figure S8:** Spin density (top) and SOMO (bottom) plots for A) **CrNSal<sup>H</sup>** B) **CrNSal<sup>OMe</sup>**.

**Table S3:** A comparison of the spin density distribution versus  $\sigma_p$  for the **CrNSal<sup>R</sup>** complexes. Using two different functionals we observe a small decrease in Cr-centered spin density as the substituent becomes more donating. The trend is continuous and small in magnitude for both functionals, indicating a gradual, yet limited spin delocalization over the ligand framework rather than a threshold-type behaviour that would signal a switch from metal to ligand-centered oxidation.

| R =                    | $\sigma_p$ | UBLYP                  | UM06L                  |
|------------------------|------------|------------------------|------------------------|
| <b>NO<sub>2</sub></b>  | 0.78       | Cr = 94.30%, L = 5.70  | Cr = 96.36%, L = 3.64% |
| <b>CF<sub>3</sub></b>  | 0.54       | Cr = 94.26%, L = 5.74% | Cr = 95.80%, L = 4.20% |
| <b>H</b>               | 0.00       | Cr = 93.99%, L = 6.01% | Cr = 95.77%, L = 4.23% |
| <b>tBu</b>             | -0.20      | Cr = 94.23%, L = 5.77% | Cr = 95.75%, L = 4.25% |
| <b>OMe</b>             | -0.27      | Cr = 93.91%, L = 6.07% | Cr = 95.63%, L = 4.37% |
| <b>OiPr</b>            | -0.45      | Cr = 93.88%, L = 6.12% | Cr = 95.49%, L = 4.51% |
| <b>NMe<sub>2</sub></b> | -0.83      | Cr = 93.35%, L = 6.65% | Cr = 95.37%, L = 4.63% |

**Table S4:** Computed relative energies (kcal/mol) of singlet (s), broken-symmetry singlet (bss), and triplet (t) states for **[CrNSal<sup>R</sup>]<sup>+</sup>** (R = tBu, OMe, OiPr, NMe<sub>2</sub>) using UBLYP, UM06L, and UMN15L functionals with the def2-TZVP basis set. Zero indicates the lowest-energy spin state for each functional.

| UBLYP/Def2TZVP |     |   | UM06L/Def2TZVP |     |   | UMN15L/Def2TZVP |     |   |
|----------------|-----|---|----------------|-----|---|-----------------|-----|---|
| s              | bss | t | s              | bss | t | s               | bss | t |

|                                        |     |     |      |     |     |      |     |     |     |
|----------------------------------------|-----|-----|------|-----|-----|------|-----|-----|-----|
| [CrNSal <sup>tBu</sup> ] <sup>+</sup>  | 0   | 2.9 | 7.7  | 0   | 3.3 | 6.9  | 0   | 1.3 | 5.0 |
| [CrNSal <sup>OMe</sup> ] <sup>+</sup>  | 0   | 0.6 | 3.4  | 0.2 | 0   | 2.1  | 2.8 | 0   | 2.4 |
| [CrNSal <sup>OiPr</sup> ] <sup>+</sup> | 0   | 0.4 | 3.3  | 0.4 | 0   | 2.3  | 2.8 | 0   | 2.5 |
| [CrNSal <sup>NMe2</sup> ] <sup>+</sup> | 2.3 | 0   | 1.35 | 3.9 | 0   | +1.2 | 7.3 | 0   | 1.4 |

**Table S5:** Computed relative energies (kcal/mol) of singlet (s), broken-symmetry singlet (bss), and triplet (t) states for [CrNSal<sup>R</sup>]<sup>+</sup> (R = tBu, OMe, OiPr, NMe<sub>2</sub>) using UBLYP/def2-TZVP/PCM(DCM) single-point calculations on geometries optimized at the UB3LYP/6-31G\*/PCM(DCM) level.

| Complex                                | Singlet | BSS | Triplet |
|----------------------------------------|---------|-----|---------|
| [CrNSal <sup>tBu</sup> ] <sup>+</sup>  | 0       | 2.8 | 6.4     |
| [CrNSal <sup>OMe</sup> ] <sup>+</sup>  | 0       | 1.9 | 2.3     |
| [CrNSal <sup>OiPr</sup> ] <sup>+</sup> | 0       | 0.3 | 2.5     |
| [CrNSal <sup>NMe2</sup> ] <sup>+</sup> | 2.3     | 0   | 0.6     |

**Table S6:** Computed relative energies (kcal/mol) of singlet (s), broken-symmetry singlet (bss), and triplet (t) states for [CrNSal<sup>R</sup>]<sup>+</sup> (R = tBu, OMe, OiPr, NMe<sub>2</sub>) using UBLYP/def2-TZVP/PCM(DCM) single-point calculations on geometries optimized at the UB3LYP-GD3/6-31G\*/PCM(DCM) level, to evaluate the influence of dispersion corrections.

| Complex                                | Singlet | BSS | Triplet |
|----------------------------------------|---------|-----|---------|
| [CrNSal <sup>tBu</sup> ] <sup>+</sup>  | 0       | 2.9 | 7.7     |
| [CrNSal <sup>OMe</sup> ] <sup>+</sup>  | 0       | 0.6 | 3.4     |
| [CrNSal <sup>OiPr</sup> ] <sup>+</sup> | 0       | 0.4 | 3.3     |
| [CrNSal <sup>NMe2</sup> ] <sup>+</sup> | 2.3     | 0   | 1.35    |

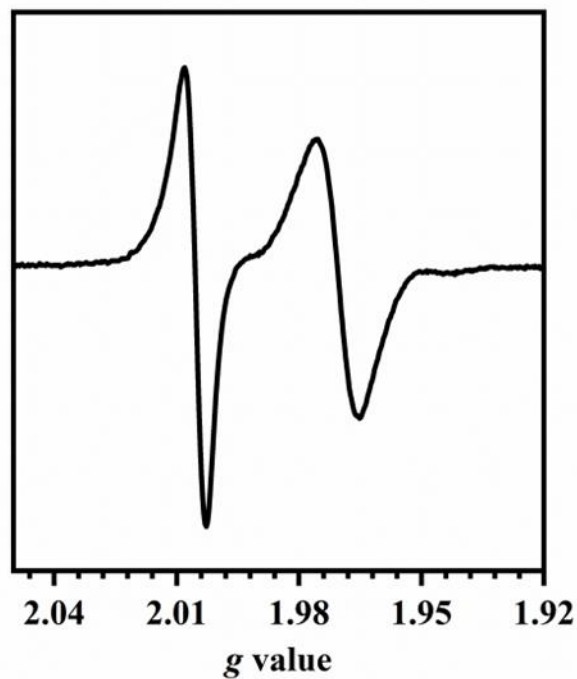

**Figure S9:** X-band EPR spectra for bis-oxidized in frozen CH<sub>2</sub>Cl<sub>2</sub> at 0.4 mM. Conditions: frequency = 9.38 GHz, power = 2.0 mW, modulation frequency = 100 kHz, modulation amplitude = 0.6 mT, and T = -173 °C.

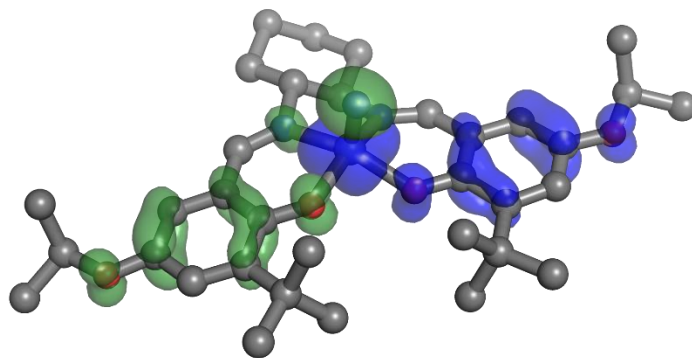

**Figure S10:** Computed spin density for the doublet Cr(V) bis-phenoxy radical dication [CrNSal<sup>OiPr</sup>]<sup>2+</sup>. See calculation section for further details.

Optimized DFT co-ordinates:

**Oxidized [CrN(Sal)<sup>NO<sub>2</sub>]<sup>+</sup>, singlet</sup>**

|   |             |             |             |
|---|-------------|-------------|-------------|
| H | 3.03726900  | -5.24187100 | -0.27810600 |
| H | -3.25658900 | -5.19213600 | 0.63526000  |
| H | -1.14569700 | -4.31783100 | -0.34637300 |
| H | 4.18360900  | -4.29159000 | 0.67200500  |
| H | 1.15502200  | -4.22635700 | 0.91667300  |
| C | 3.59143300  | -4.29825900 | -0.24994500 |
| H | -4.19947900 | -4.33398400 | -0.58547200 |
| H | 4.27483900  | -4.29238400 | -1.10631200 |
| H | 1.24343800  | -4.20922100 | -1.62945800 |
| C | -3.76286400 | -4.24683500 | 0.41565700  |
| H | -2.06839700 | -3.40680500 | -1.55727200 |
| H | -4.57389000 | -4.12895200 | 1.14323500  |
| H | -1.68747200 | -4.09101800 | 2.12700900  |
| C | -1.63806100 | -3.36108300 | -0.55054400 |
| H | 2.24869600  | -3.19518800 | 1.85817900  |
| C | 1.66345300  | -3.25644200 | 0.93386500  |
| C | 1.78459200  | -3.25691300 | -1.61747100 |
| C | 2.58780900  | -3.12966600 | -0.30096800 |
| H | 2.46060300  | -3.23764200 | -2.47959200 |
| C | -2.73785600 | -3.09964200 | 0.50361700  |
| H | -0.87368800 | -2.58382100 | -0.54007300 |
| C | -2.13801800 | -3.11180000 | 1.93096100  |
| H | 0.89723900  | -2.48210700 | 0.96325400  |
| H | 5.30096900  | -2.54933000 | -0.16757900 |
| H | 1.05584600  | -2.45343300 | -1.73694900 |
| H | -5.35149500 | -2.49433100 | -0.21750900 |
| H | -2.92077000 | -2.94179900 | 2.67864100  |
| H | -1.36487400 | -2.35319600 | 2.06297100  |
| C | 3.29806000  | -1.76727400 | -0.27336100 |
| C | 4.68484300  | -1.66288100 | -0.20939200 |
| C | -3.38473500 | -1.73685800 | 0.21321800  |
| C | -4.72213700 | -1.61885100 | -0.14774900 |
| O | 1.24283100  | -0.52990800 | -0.39152900 |
| C | 2.57498100  | -0.54354100 | -0.29415800 |
| O | -1.36122800 | -0.54454500 | 0.62788500  |
| C | -2.63245000 | -0.52688000 | 0.25965100  |
| C | 5.33688600  | -0.42356900 | -0.20070600 |
| N | 6.80128700  | -0.39041900 | -0.14458700 |
| C | -5.31139000 | -0.37761200 | -0.42693400 |
| N | -6.72942700 | -0.32846400 | -0.79155500 |

|    |             |             |             |
|----|-------------|-------------|-------------|
| Cr | 0.07774700  | 0.54039300  | 0.48210700  |
| N  | 0.63261200  | 0.63458900  | 1.87512300  |
| C  | 3.24182900  | 0.71368300  | -0.28297600 |
| C  | 4.64196300  | 0.76761000  | -0.25389400 |
| C  | -3.23708100 | 0.73114900  | -0.02205900 |
| C  | -4.59630800 | 0.79997600  | -0.35954300 |
| H  | 5.16833300  | 1.71431600  | -0.26328200 |
| H  | -5.07615000 | 1.74933200  | -0.56375600 |
| C  | 2.50534700  | 1.94965300  | -0.40642200 |
| C  | -2.50585600 | 1.96165000  | 0.12253900  |
| N  | 1.23175400  | 2.08603300  | -0.24264400 |
| N  | -1.24644100 | 2.07650900  | 0.40018400  |
| H  | 3.09121100  | 2.82539200  | -0.67841400 |
| H  | -3.09317100 | 2.87095200  | 0.01303300  |
| C  | 0.55252500  | 3.38352100  | -0.45200700 |
| H  | 0.11531800  | 3.34412600  | -1.45911500 |
| C  | -0.60258200 | 3.39810600  | 0.55717000  |
| H  | -0.17485700 | 3.39993300  | 1.56811000  |
| H  | 1.93249600  | 4.61516300  | 0.65547100  |
| C  | 1.42661100  | 4.63542400  | -0.31879800 |
| H  | 2.19788500  | 4.65033100  | -1.09554300 |
| H  | -2.28659900 | 4.63407100  | 1.12943000  |
| C  | -1.47962500 | 4.63843900  | 0.38847500  |
| H  | -1.93696500 | 4.64482000  | -0.60980500 |
| C  | -0.60676800 | 5.89470300  | 0.55611200  |
| C  | 0.55799200  | 5.89997100  | -0.44132800 |
| H  | -0.21727900 | 5.93251200  | 1.58206000  |
| H  | 0.16370200  | 5.96998100  | -1.46383100 |
| H  | 1.18936700  | 6.78072200  | -0.28490300 |
| H  | -1.22812300 | 6.78547500  | 0.41843100  |
| O  | -7.22391800 | 0.77442600  | -1.03346900 |
| O  | -7.35165600 | -1.39073400 | -0.83731100 |
| O  | 7.35191400  | 0.71213400  | -0.13539100 |
| O  | 7.40326500  | -1.46461800 | -0.11077200 |

**Oxidized [CrN(Sal)<sup>H</sup>]<sup>+</sup>, singlet**

|   |             |             |             |
|---|-------------|-------------|-------------|
| O | 0.70290700  | -1.33474300 | 0.49538700  |
| N | -1.91763700 | -1.40215400 | 0.27526800  |
| C | 0.77493000  | -2.57300600 | 0.00876100  |
| O | 0.50262000  | 1.29507500  | -0.39766400 |
| N | -2.10960200 | 1.08846100  | -0.25576100 |
| C | 2.03064100  | -3.23061200 | -0.10002700 |
| C | 2.00023300  | -4.54329800 | -0.57578700 |

|   |             |             |             |
|---|-------------|-------------|-------------|
| H | 2.93328600  | -5.08035300 | -0.69260800 |
| C | 0.81535400  | -5.22035400 | -0.90920600 |
| C | -0.39925500 | -4.57956900 | -0.77358000 |
| H | -1.32996800 | -5.08877900 | -1.00646500 |
| C | -0.43431000 | -3.24336700 | -0.32450000 |
| C | 3.34568300  | -2.50964300 | 0.23683300  |
| C | 3.33316000  | -2.02743700 | 1.70798600  |
| H | 4.27838700  | -1.52136700 | 1.93550900  |
| H | 3.23065600  | -2.87887600 | 2.39053600  |
| H | 2.51941300  | -1.32789300 | 1.90519800  |
| C | 3.51367300  | -1.30940300 | -0.72224900 |
| H | 2.68106200  | -0.61045600 | -0.64283900 |
| H | 3.57800600  | -1.65048800 | -1.76207500 |
| H | 4.43369600  | -0.76366900 | -0.48537600 |
| C | 4.56880600  | -3.43017500 | 0.05889700  |
| H | 5.47481400  | -2.87127600 | 0.31537100  |
| H | 4.67831100  | -3.77548100 | -0.97526700 |
| H | 4.52247400  | -4.30582400 | 0.71623600  |
| C | -1.70959500 | -2.62335500 | -0.11136900 |
| H | -2.57503300 | -3.26383500 | -0.26995500 |
| C | -3.28017400 | -0.86744200 | 0.46410000  |
| H | -3.31093100 | -0.48091300 | 1.49109600  |
| C | -4.45663900 | -1.82299200 | 0.26440200  |
| H | -4.38711000 | -2.65944900 | 0.96870200  |
| H | -4.44099400 | -2.23715500 | -0.75218700 |
| C | -5.77091900 | -1.05105500 | 0.47343100  |
| H | -6.61714200 | -1.72783400 | 0.31557800  |
| H | -5.82921400 | -0.70461200 | 1.51401600  |
| C | -5.86556900 | 0.14874200  | -0.47791600 |
| H | -6.79012400 | 0.70698800  | -0.29654000 |
| H | -5.91071500 | -0.21142400 | -1.51469900 |
| C | -4.66643800 | 1.10102400  | -0.32478900 |
| H | -4.74202000 | 1.90058800  | -1.06906900 |
| H | -4.67733600 | 1.56826400  | 0.66888300  |
| C | -3.35389100 | 0.32877200  | -0.49578100 |
| H | -3.29086400 | -0.06460700 | -1.52022500 |
| C | -2.06579000 | 2.37836900  | -0.35176400 |
| H | -2.98399600 | 2.91122100  | -0.59347000 |
| C | -0.89255200 | 3.19482500  | -0.18583200 |
| C | -1.04825100 | 4.59227000  | -0.08877500 |
| H | -2.04726800 | 5.01822900  | -0.07651800 |
| C | 0.06989300  | 5.39622900  | 0.00630400  |
| C | 1.34721800  | 4.81629400  | -0.02920200 |
| H | 2.20044500  | 5.47876200  | 0.04658200  |

|    |             |             |             |
|----|-------------|-------------|-------------|
| C  | 1.56725600  | 3.44155200  | -0.16092600 |
| C  | 0.40959300  | 2.62542800  | -0.22497400 |
| C  | 2.98170500  | 2.84103900  | -0.21552400 |
| C  | 3.17674300  | 1.86107800  | 0.96655200  |
| H  | 3.07237500  | 2.38993600  | 1.92088700  |
| H  | 4.18097800  | 1.42459100  | 0.92780700  |
| H  | 2.45807900  | 1.04217100  | 0.95110400  |
| C  | 3.17911100  | 2.12522200  | -1.57304900 |
| H  | 3.11743400  | 2.84723200  | -2.39543900 |
| H  | 2.42911600  | 1.35096900  | -1.74165900 |
| H  | 4.16762000  | 1.65343700  | -1.60669400 |
| C  | 4.07368100  | 3.92303000  | -0.09897300 |
| H  | 4.02106000  | 4.65128500  | -0.91594700 |
| H  | 5.05655700  | 3.44268300  | -0.14903000 |
| H  | 4.01845300  | 4.46245800  | 0.85334700  |
| Cr | -0.48505300 | 0.02394400  | 0.42631700  |
| N  | -0.60425100 | 0.51905000  | 1.84248100  |
| H  | 0.86251700  | -6.24449000 | -1.26394000 |
| H  | -0.03031300 | 6.47216000  | 0.10360300  |

**Oxidized [CrN(Sal)<sup>OMe</sup>]<sup>+</sup>, singlet**

|   |             |             |             |
|---|-------------|-------------|-------------|
| H | -3.38212600 | -5.06058300 | 0.90247700  |
| H | 2.98889100  | -5.21023700 | -0.22380300 |
| H | -1.88699300 | -3.88712500 | 2.38762100  |
| H | 1.16016100  | -4.15278900 | 1.03037200  |
| H | 1.15092700  | -4.18803400 | -1.51185900 |
| H | -1.19996200 | -4.31833100 | -0.02607000 |
| C | -3.84937800 | -4.12767700 | 0.57064600  |
| H | -4.70320300 | -3.93242500 | 1.22957100  |
| C | 3.55258300  | -4.27138500 | -0.23250000 |
| H | -4.22248300 | -4.29382600 | -0.44624100 |
| H | 4.20162700  | -4.28576100 | -1.11544200 |
| H | 4.18210900  | -4.25783700 | 0.66448000  |
| C | -2.28746000 | -2.91235500 | 2.08647200  |
| C | 1.68753700  | -3.19252000 | 1.01326500  |
| C | 1.70145300  | -3.24078300 | -1.54049000 |
| H | -3.10429900 | -2.65518400 | 2.77058300  |
| C | -1.64980000 | -3.36632900 | -0.32944300 |
| H | 2.34259800  | -3.24560000 | -2.42959700 |
| H | 2.31639500  | -3.13358800 | 1.90906500  |
| H | -2.01785900 | -3.47534600 | -1.35627800 |
| C | -2.80442900 | -2.99625000 | 0.62916400  |
| C | 2.56002200  | -3.09209400 | -0.26171700 |

|    |             |             |             |
|----|-------------|-------------|-------------|
| H  | -1.49535300 | -2.17084300 | 2.19926500  |
| H  | 0.94121100  | -2.39999400 | 1.06875500  |
| H  | 0.97800100  | -2.43124400 | -1.64504900 |
| H  | -0.86681100 | -2.60857300 | -0.32465400 |
| H  | -5.30641800 | -2.42704900 | -0.32804300 |
| H  | 5.24494900  | -2.55121800 | -0.23440200 |
| H  | -7.52616900 | -1.75693000 | -0.21167600 |
| H  | -6.97787800 | -2.09961300 | -1.88404200 |
| H  | 7.32891100  | -2.09919100 | -1.13376100 |
| H  | 7.31856300  | -2.06510700 | 0.65791100  |
| C  | -3.39132400 | -1.64358800 | 0.19245200  |
| C  | 3.27418900  | -1.72971300 | -0.28201200 |
| C  | -4.69684000 | -1.53661800 | -0.28606400 |
| C  | 4.66885400  | -1.63819200 | -0.26334600 |
| C  | -7.38080000 | -1.33243600 | -1.21214400 |
| C  | 7.50808000  | -1.47686800 | -0.24834100 |
| H  | -8.33612200 | -0.97669700 | -1.59887900 |
| H  | 8.54423000  | -1.13653800 | -0.24873300 |
| O  | -1.36017100 | -0.47957400 | 0.66533200  |
| O  | 1.20330100  | -0.50582600 | -0.36158300 |
| C  | -2.60454000 | -0.45755400 | 0.20103300  |
| C  | 2.54570500  | -0.51433600 | -0.28838800 |
| C  | -5.26364800 | -0.31738400 | -0.71050100 |
| C  | 5.35824900  | -0.41132000 | -0.28263900 |
| O  | -6.53234900 | -0.18225800 | -1.16910800 |
| O  | 6.71320500  | -0.29106100 | -0.27526800 |
| Cr | 0.08082700  | 0.61140500  | 0.52327100  |
| N  | 0.66230200  | 0.69011800  | 1.91070000  |
| C  | -3.17434500 | 0.78280000  | -0.20995500 |
| C  | 3.23188800  | 0.73149200  | -0.29800100 |
| C  | -4.50337800 | 0.84402400  | -0.65248700 |
| C  | 4.63515800  | 0.77263200  | -0.31734200 |
| H  | -4.95111900 | 1.79013500  | -0.93850900 |
| H  | 5.16183600  | 1.72105800  | -0.34880600 |
| C  | -2.46229800 | 2.01963800  | -0.03269100 |
| C  | 2.51507300  | 1.97685100  | -0.41066300 |
| N  | 1.24519700  | 2.13486600  | -0.22338700 |
| N  | -1.23758600 | 2.14003400  | 0.37516300  |
| H  | 3.11099300  | 2.84288000  | -0.69434600 |
| H  | -3.03548500 | 2.92492400  | -0.22476300 |
| H  | 0.16955900  | 3.42515400  | -1.44914800 |
| C  | 0.58534900  | 3.44100600  | -0.43161200 |
| C  | -0.59726300 | 3.45726000  | 0.54949200  |
| H  | -0.19113400 | 3.45522300  | 1.56917500  |

|   |             |            |             |
|---|-------------|------------|-------------|
| H | -1.88369900 | 4.73170600 | -0.64475900 |
| H | 2.25754600  | 4.70576600 | -1.01240100 |
| C | 1.46433100  | 4.68495200 | -0.25813700 |
| C | -1.46018900 | 4.70539700 | 0.36777800  |
| H | -2.29320300 | 4.69539500 | 1.07963700  |
| H | 1.94469800  | 4.64575500 | 0.72840200  |
| H | 0.24387900  | 6.04571800 | -1.41720000 |
| C | 0.61049000  | 5.95922000 | -0.38537800 |
| C | -0.58309300 | 5.95203400 | 0.57852500  |
| H | -0.22183900 | 5.97220800 | 1.61550700  |
| H | 1.24370900  | 6.83350700 | -0.20079700 |
| H | -1.19081900 | 6.85171600 | 0.43576200  |

**Oxidized [CrN(Sal)<sup>OIPr</sup>]<sup>+</sup>, singlet**

|   |             |             |             |
|---|-------------|-------------|-------------|
| O | -1.33585200 | -0.68474600 | 0.76579700  |
| N | -1.24189300 | 1.93433000  | 0.49529200  |
| C | -2.59649300 | -0.66607900 | 0.35891000  |
| O | 1.18755500  | -0.68629700 | -0.35304300 |
| N | 1.21961100  | 1.95497000  | -0.18508800 |
| C | -3.37931200 | -1.86196700 | 0.38749300  |
| C | -4.69681300 | -1.75178700 | -0.02827900 |
| H | -5.33834000 | -2.62339900 | -0.05482500 |
| C | -5.29795700 | -0.53576900 | -0.43286500 |
| C | -4.54694300 | 0.63024000  | -0.41147400 |
| H | -4.97395200 | 1.59162200  | -0.66788900 |
| C | -3.19159500 | 0.56772300  | -0.02581200 |
| C | -2.76683300 | -3.21101500 | 0.79573600  |
| C | -2.18419200 | -3.12667700 | 2.22786800  |
| H | -1.76841600 | -4.10079000 | 2.50981000  |
| H | -2.96940800 | -2.87180200 | 2.94893000  |
| H | -1.38922400 | -2.38348200 | 2.30477900  |
| C | -1.65553800 | -3.57466200 | -0.21509600 |
| H | -0.87534500 | -2.81444500 | -0.24419300 |
| H | -2.06957300 | -3.68300100 | -1.22428300 |
| H | -1.18916500 | -4.52564600 | 0.06558700  |
| C | -3.81099500 | -4.34421100 | 0.78205100  |
| H | -3.32776800 | -5.27730700 | 1.08978600  |
| H | -4.23038200 | -4.50669800 | -0.21707100 |
| H | -4.63432500 | -4.15076200 | 1.47903100  |
| C | -2.48044600 | 1.80537400  | 0.12744600  |
| H | -3.06368400 | 2.70873000  | -0.04219300 |
| C | -0.60885900 | 3.25682300  | 0.65491400  |
| H | -0.17326900 | 3.25558700  | 1.66232700  |

|    |             |             |             |
|----|-------------|-------------|-------------|
| C  | -1.48754000 | 4.49815600  | 0.50348900  |
| H  | -2.30132700 | 4.47695600  | 1.23712200  |
| H  | -1.93825000 | 4.52633700  | -0.49747500 |
| C  | -0.61595800 | 5.75107800  | 0.70022900  |
| H  | -1.23427900 | 6.64659300  | 0.57810500  |
| H  | -0.23040200 | 5.76771900  | 1.72848400  |
| C  | 0.55420900  | 5.77537800  | -0.29189900 |
| H  | 1.18494500  | 6.65303300  | -0.11481000 |
| H  | 0.16190900  | 5.86832800  | -1.31361400 |
| C  | 1.42055100  | 4.50648100  | -0.19854200 |
| H  | 2.19279200  | 4.54017200  | -0.97393100 |
| H  | 1.92819600  | 4.46170200  | 0.77407200  |
| C  | 0.54578800  | 3.25799800  | -0.36019300 |
| H  | 0.10094500  | 3.25126800  | -1.36536100 |
| C  | 2.48532100  | 1.80383900  | -0.41310100 |
| H  | 3.06761600  | 2.67730600  | -0.70287400 |
| C  | 3.20967400  | 0.56192500  | -0.34444300 |
| C  | 4.61943800  | 0.61677700  | -0.41864900 |
| H  | 5.10299500  | 1.58552100  | -0.44510800 |
| C  | 5.34173500  | -0.56494400 | -0.44307000 |
| C  | 4.64735400  | -1.79513500 | -0.42367600 |
| H  | 5.26471900  | -2.68432200 | -0.44112300 |
| C  | 3.26313300  | -1.90165800 | -0.38981900 |
| C  | 2.52817600  | -0.68313400 | -0.33687700 |
| C  | 2.55603100  | -3.26648000 | -0.36564500 |
| C  | 1.74622300  | -3.39675600 | 0.94747700  |
| H  | 2.41710000  | -3.35175700 | 1.81309100  |
| H  | 1.22509700  | -4.36027000 | 0.97063500  |
| H  | 0.99950200  | -2.60964400 | 1.05412800  |
| C  | 1.63721300  | -3.39426800 | -1.60403200 |
| H  | 2.23396100  | -3.37419700 | -2.52335800 |
| H  | 0.90295200  | -2.58930600 | -1.65481000 |
| H  | 1.09643100  | -4.34691500 | -1.56944500 |
| C  | 3.55640800  | -4.43835000 | -0.40859800 |
| H  | 4.16445000  | -4.42628400 | -1.32014000 |
| H  | 3.00013500  | -5.38162700 | -0.39527200 |
| H  | 4.22704000  | -4.43891500 | 0.45797700  |
| Cr | 0.09386400  | 0.42388800  | 0.58320200  |
| N  | 0.72749700  | 0.48961700  | 1.94852800  |
| C  | -7.35989700 | 0.52726900  | -1.18273700 |
| H  | -6.73384300 | 1.16515400  | -1.81986900 |
| C  | 7.53362600  | 0.49981200  | -0.46413400 |
| H  | 7.10267800  | 1.26128500  | -1.12755000 |
| O  | -6.59238400 | -0.64687300 | -0.80957100 |

|   |             |             |             |
|---|-------------|-------------|-------------|
| O | 6.69300700  | -0.67951800 | -0.50568100 |
| C | -8.53098700 | -0.00012200 | -1.99951700 |
| H | -9.14300500 | -0.67563200 | -1.39236500 |
| H | -9.15829500 | 0.83223300  | -2.33359800 |
| H | -8.17404700 | -0.54541800 | -2.87832600 |
| C | -7.80257600 | 1.28280900  | 0.06802700  |
| H | -8.43762100 | 0.63932100  | 0.68591500  |
| H | -6.94900600 | 1.60503000  | 0.67189800  |
| H | -8.37671300 | 2.17090300  | -0.21572100 |
| C | 7.63302200  | 1.02791400  | 0.96539500  |
| H | 8.08168600  | 0.26664000  | 1.61243000  |
| H | 8.26251100  | 1.92351500  | 0.99167700  |
| H | 6.65045000  | 1.28739200  | 1.37055200  |
| C | 8.87817100  | 0.05588700  | -1.02344800 |
| H | 9.57463200  | 0.90010900  | -1.04086900 |
| H | 9.30583600  | -0.73559000 | -0.39866200 |
| H | 8.76434300  | -0.32632600 | -2.04238100 |

**Oxidized [CrN(Sal)<sup>H</sup>]<sup>+</sup>, bss**

|   |             |             |             |
|---|-------------|-------------|-------------|
| O | 0.79570800  | -1.32115900 | 0.27212800  |
| N | -1.95337200 | -1.45390200 | 0.20190000  |
| C | 0.81390400  | -2.55938400 | -0.04698800 |
| O | 0.57123600  | 1.33108500  | -0.17468300 |
| N | -2.14011600 | 1.12802200  | -0.15301400 |
| C | 2.09627600  | -3.25139100 | -0.13100300 |
| C | 2.06494400  | -4.58507500 | -0.51655300 |
| H | 2.98950200  | -5.14043400 | -0.60443700 |
| C | 0.86805500  | -5.26448000 | -0.80025000 |
| C | -0.36699500 | -4.61602400 | -0.69008000 |
| H | -1.28505500 | -5.16006500 | -0.89095600 |
| C | -0.42181300 | -3.27857100 | -0.31620400 |
| C | 3.40072200  | -2.51640500 | 0.18551500  |
| C | 3.36371300  | -1.98125100 | 1.64173500  |
| H | 4.31037300  | -1.47518300 | 1.86068900  |
| H | 3.24651700  | -2.80585800 | 2.35390700  |
| H | 2.55331700  | -1.26783600 | 1.79567800  |
| C | 3.58645600  | -1.34212100 | -0.80859200 |
| H | 2.77957900  | -0.61597200 | -0.72759800 |
| H | 3.63068700  | -1.70895200 | -1.84051200 |
| H | 4.52914300  | -0.82870900 | -0.59004100 |
| C | 4.62391600  | -3.44500100 | 0.05668400  |
| H | 5.52663300  | -2.87580400 | 0.29956800  |
| H | 4.74310300  | -3.83025400 | -0.96215700 |

|    |             |             |             |
|----|-------------|-------------|-------------|
| H  | 4.57207300  | -4.29287100 | 0.74892300  |
| C  | -1.72654000 | -2.67105600 | -0.15981000 |
| H  | -2.56862400 | -3.33540100 | -0.34746100 |
| C  | -3.32171600 | -0.92402000 | 0.38110900  |
| H  | -3.38016500 | -0.64373100 | 1.44145800  |
| C  | -4.49015700 | -1.85323800 | 0.05218900  |
| H  | -4.43945100 | -2.75732600 | 0.66936800  |
| H  | -4.43854100 | -2.16323800 | -1.00026600 |
| C  | -5.81595200 | -1.11655200 | 0.31037500  |
| H  | -6.65259300 | -1.77332400 | 0.04954300  |
| H  | -5.90461000 | -0.89901600 | 1.38321800  |
| C  | -5.89591500 | 0.19054700  | -0.48775400 |
| H  | -6.82671400 | 0.71983400  | -0.25729700 |
| H  | -5.91953700 | -0.03904800 | -1.56195800 |
| C  | -4.70212000 | 1.11646600  | -0.19747800 |
| H  | -4.77381900 | 2.00262300  | -0.83589900 |
| H  | -4.72542700 | 1.45854000  | 0.84567000  |
| C  | -3.38254500 | 0.37654400  | -0.44788400 |
| H  | -3.32729800 | 0.08927800  | -1.50771600 |
| C  | -2.07472900 | 2.41837600  | -0.27736200 |
| H  | -2.98364400 | 2.96331200  | -0.53008300 |
| C  | -0.89038900 | 3.21978500  | -0.14299600 |
| C  | -1.04442500 | 4.62258100  | -0.13419600 |
| H  | -2.04443600 | 5.04733100  | -0.15268800 |
| C  | 0.06731800  | 5.43785800  | -0.09331200 |
| C  | 1.35208800  | 4.86267800  | -0.10369400 |
| H  | 2.19993200  | 5.53652200  | -0.08287000 |
| C  | 1.57618700  | 3.48938800  | -0.14647600 |
| C  | 0.42179200  | 2.63926300  | -0.13879800 |
| C  | 2.99392500  | 2.89624200  | -0.21041100 |
| C  | 3.23699800  | 1.93982300  | 0.98293100  |
| H  | 3.14466500  | 2.48190100  | 1.93153200  |
| H  | 4.25137600  | 1.52755700  | 0.92645800  |
| H  | 2.53237500  | 1.10921000  | 0.99040200  |
| C  | 3.16009500  | 2.14696000  | -1.55534800 |
| H  | 3.07673800  | 2.84745100  | -2.39462800 |
| H  | 2.40434300  | 1.37018700  | -1.67957400 |
| H  | 4.14856500  | 1.67503700  | -1.60259700 |
| C  | 4.08095300  | 3.98781600  | -0.15090300 |
| H  | 4.00964900  | 4.68881900  | -0.99021400 |
| H  | 5.06661200  | 3.51295300  | -0.20329800 |
| H  | 4.03805800  | 4.55883600  | 0.78369500  |
| Cr | -0.59906900 | 0.02208900  | 0.51284100  |
| N  | -0.67066000 | 0.26380000  | 2.01259900  |

|   |             |             |             |
|---|-------------|-------------|-------------|
| H | 0.90284500  | -6.30728400 | -1.09719500 |
| H | -0.03930400 | 6.51739200  | -0.06548400 |

**Oxidized [CrN(Sal)<sup>OMe</sup>]<sup>+</sup>, bss**

|   |             |             |             |
|---|-------------|-------------|-------------|
| H | -3.26236100 | -5.20012100 | 0.31927600  |
| H | 3.13679700  | -5.19711500 | -0.17096700 |
| H | -1.67211900 | -4.13655800 | 1.82898200  |
| H | 1.21661800  | -4.21806600 | 0.94617100  |
| H | 1.36805700  | -4.18124100 | -1.58427500 |
| H | -1.21989500 | -4.31606000 | -0.66800600 |
| C | -3.78136900 | -4.25089300 | 0.15391500  |
| H | -4.57201100 | -4.17334900 | 0.90901000  |
| C | 3.68116800  | -4.24701100 | -0.14170300 |
| H | -4.24500000 | -4.29920700 | -0.83802700 |
| H | 4.37958700  | -4.24422100 | -0.98648200 |
| H | 4.26020800  | -4.22706700 | 0.78894700  |
| C | -2.13491200 | -3.15495200 | 1.67896200  |
| C | 1.70371500  | -3.23621700 | 0.98227900  |
| C | 1.90138300  | -3.22359900 | -1.55413300 |
| H | -2.90507700 | -3.02140900 | 2.44708900  |
| C | -1.67145700 | -3.32894000 | -0.81550600 |
| H | 2.59846700  | -3.19559600 | -2.40007400 |
| H | 2.25415900  | -3.16620500 | 1.92808900  |
| H | -2.10735200 | -3.30211600 | -1.82092200 |
| C | -2.76164700 | -3.10052600 | 0.26125000  |
| C | 2.67000800  | -3.08569500 | -0.21759100 |
| H | -1.36721300 | -2.39287200 | 1.81620700  |
| H | 0.92924000  | -2.47059300 | 0.97530100  |
| H | 1.17300800  | -2.42154200 | -1.68062900 |
| H | -0.88086000 | -2.58314800 | -0.75356000 |
| H | -5.38703600 | -2.49477500 | -0.26667800 |
| H | 5.34001100  | -2.49937400 | -0.11581200 |
| H | -7.57817300 | -1.85390500 | 0.23650200  |
| H | -7.28237300 | -1.96314300 | -1.53375200 |
| H | 7.43893500  | -2.02582400 | -0.94426800 |
| H | 7.37740700  | -1.97283700 | 0.84482600  |
| C | -3.42121400 | -1.73353400 | 0.04542000  |
| C | 3.35800600  | -1.70864000 | -0.18037900 |
| C | -4.77238900 | -1.60882700 | -0.20828800 |
| C | 4.74754200  | -1.59656700 | -0.14624800 |
| C | -7.57501200 | -1.30526000 | -0.71009400 |
| C | 7.58376400  | -1.38983800 | -0.06169400 |
| H | -8.56023500 | -0.88327300 | -0.90111300 |

|    |             |             |             |
|----|-------------|-------------|-------------|
| H  | 8.61605800  | -1.03770600 | -0.03685500 |
| O  | -1.36722800 | -0.59981200 | 0.32460800  |
| O  | 1.26656200  | -0.55584800 | -0.23500800 |
| C  | -2.62273300 | -0.51174900 | 0.10978000  |
| C  | 2.59037100  | -0.50492700 | -0.19115000 |
| C  | -5.39074200 | -0.34792900 | -0.39113300 |
| C  | 5.41857300  | -0.35711100 | -0.15479000 |
| O  | -6.68854500 | -0.17134200 | -0.63127100 |
| O  | 6.77639000  | -0.21648400 | -0.12359000 |
| Cr | 0.08939200  | 0.69190400  | 0.53710300  |
| N  | 0.39233700  | 0.72493400  | 2.02652700  |
| C  | -3.26999100 | 0.77675400  | -0.06685400 |
| C  | 3.27121000  | 0.75291400  | -0.21104400 |
| C  | -4.62735000 | 0.83796400  | -0.31389500 |
| C  | 4.67795800  | 0.81111300  | -0.20912300 |
| H  | -5.13621800 | 1.78763900  | -0.44360200 |
| H  | 5.19126600  | 1.76756300  | -0.23681900 |
| C  | -2.55152300 | 2.03602600  | 0.03884100  |
| C  | 2.55672200  | 1.99491200  | -0.34334200 |
| N  | 1.28166900  | 2.15428700  | -0.16975800 |
| N  | -1.29777400 | 2.16649900  | 0.29855200  |
| H  | 3.15754800  | 2.85680500  | -0.63186100 |
| H  | -3.16530800 | 2.92518000  | -0.09981700 |
| H  | 0.26186100  | 3.38066300  | -1.50457300 |
| C  | 0.60562400  | 3.43928000  | -0.46150500 |
| C  | -0.65258800 | 3.49169500  | 0.42968800  |
| H  | -0.31723400 | 3.54145500  | 1.47452400  |
| H  | -1.87699700 | 4.67095600  | -0.90936500 |
| H  | 2.30629300  | 4.69528200  | -0.96788100 |
| C  | 1.45031600  | 4.70697200  | -0.28589200 |
| C  | -1.50570400 | 4.72319400  | 0.12314700  |
| H  | -2.37551300 | 4.75716800  | 0.78863400  |
| H  | 1.84530900  | 4.73207200  | 0.73839100  |
| H  | 0.31366500  | 5.96939900  | -1.62508100 |
| C  | 0.60122600  | 5.95832600  | -0.56462000 |
| C  | -0.66107000 | 5.99577600  | 0.30502500  |
| H  | -0.37740200 | 6.09312600  | 1.36159200  |
| H  | 1.20888200  | 6.85319600  | -0.39224900 |
| H  | -1.26877800 | 6.87269600  | 0.05753800  |

**Oxidized [CrN(Sal)<sup>OiP</sup>]<sup>+</sup>, bss**

|   |             |             |            |
|---|-------------|-------------|------------|
| O | -1.35947800 | -0.79173800 | 0.37327100 |
| N | -1.29695200 | 1.96652600  | 0.34261900 |

|   |             |             |             |
|---|-------------|-------------|-------------|
| C | -2.61945400 | -0.71023000 | 0.18177200  |
| O | 1.26620900  | -0.75062300 | -0.22398000 |
| N | 1.27030100  | 1.95860600  | -0.17346700 |
| C | -3.41516700 | -1.93492900 | 0.14305500  |
| C | -4.76023300 | -1.80443100 | -0.09808200 |
| H | -5.41026100 | -2.66839000 | -0.14637300 |
| C | -5.39610300 | -0.54519400 | -0.29375800 |
| C | -4.64030400 | 0.64200000  | -0.22950400 |
| H | -5.11086600 | 1.60922900  | -0.35433300 |
| C | -3.27391000 | 0.57404700  | 0.00645300  |
| C | -2.75262000 | -3.29914400 | 0.37048700  |
| C | -2.09964300 | -3.33162300 | 1.77619800  |
| H | -1.63916500 | -4.31275200 | 1.93668100  |
| H | -2.85406800 | -3.17904000 | 2.55645100  |
| H | -1.32511600 | -2.57147700 | 1.88493800  |
| C | -1.68334100 | -3.54720800 | -0.72152400 |
| H | -0.89281600 | -2.79928000 | -0.68827600 |
| H | -2.13789400 | -3.53891400 | -1.71903100 |
| H | -1.22681400 | -4.53082900 | -0.56527300 |
| C | -3.77852000 | -4.44658200 | 0.30083600  |
| H | -3.26126800 | -5.39557300 | 0.47398900  |
| H | -4.25986900 | -4.50866100 | -0.68173500 |
| H | -4.55629000 | -4.35032000 | 1.06690200  |
| C | -2.55515300 | 1.83198300  | 0.09995200  |
| H | -3.16940100 | 2.72182600  | -0.03164400 |
| C | -0.65374100 | 3.29363800  | 0.45984100  |
| H | -0.29789200 | 3.34609700  | 1.49774100  |
| C | -1.51511000 | 4.52296900  | 0.16825100  |
| H | -2.37179300 | 4.55631700  | 0.85068300  |
| H | -1.90642200 | 4.46907000  | -0.85673400 |
| C | -0.66899300 | 5.79718800  | 0.33136000  |
| H | -1.28291700 | 6.67290800  | 0.09518200  |
| H | -0.36384700 | 5.89635300  | 1.38176200  |
| C | 0.57538600  | 5.76038100  | -0.56367900 |
| H | 1.18420100  | 6.65719600  | -0.40604200 |
| H | 0.26619000  | 5.76802200  | -1.61809800 |
| C | 1.43271900  | 4.51159900  | -0.29890700 |
| H | 2.27521300  | 4.50046200  | -0.99756700 |
| H | 1.84756800  | 4.54010300  | 0.71742400  |
| C | 0.58750600  | 3.24174700  | -0.45542000 |
| H | 0.22297300  | 3.18141700  | -1.49145100 |
| C | 2.54367100  | 1.80043200  | -0.37433400 |
| H | 3.13445200  | 2.66584800  | -0.67331600 |
| C | 3.26467700  | 0.56317100  | -0.26452600 |

|    |             |             |             |
|----|-------------|-------------|-------------|
| C  | 4.67896300  | 0.63068600  | -0.30920500 |
| H  | 5.15232200  | 1.60466500  | -0.34604700 |
| C  | 5.41615000  | -0.53815800 | -0.28891100 |
| C  | 4.73729900  | -1.77911300 | -0.26196100 |
| H  | 5.36896800  | -2.65877600 | -0.25769800 |
| C  | 3.35729200  | -1.90232500 | -0.25039300 |
| C  | 2.58663500  | -0.69265600 | -0.22803800 |
| C  | 2.67033500  | -3.27897000 | -0.26993200 |
| C  | 1.74567500  | -3.43670500 | 0.96147800  |
| H  | 2.32744900  | -3.36623700 | 1.88831300  |
| H  | 1.26320800  | -4.42117500 | 0.93902300  |
| H  | 0.96679400  | -2.67564800 | 0.98315500  |
| C  | 1.85744400  | -3.41242800 | -1.58038600 |
| H  | 2.52564900  | -3.38012600 | -2.44913800 |
| H  | 1.12367000  | -2.61134700 | -1.67934800 |
| H  | 1.32489000  | -4.37074100 | -1.59609400 |
| C  | 3.68835400  | -4.43578400 | -0.23318900 |
| H  | 4.35871800  | -4.42422900 | -1.10008400 |
| H  | 3.14780900  | -5.38842100 | -0.24899400 |
| H  | 4.29805200  | -4.41603500 | 0.67748400  |
| Cr | 0.09618100  | 0.50011800  | 0.56125600  |
| N  | 0.42631400  | 0.53896700  | 2.04526400  |
| C  | -7.53595600 | 0.58152500  | -0.70084800 |
| H  | -6.97902200 | 1.29492400  | -1.31753500 |
| C  | 7.59530200  | 0.55167300  | -0.27680300 |
| H  | 7.17296500  | 1.29592700  | -0.96525900 |
| O  | -6.70257400 | -0.61397400 | -0.52569200 |
| O  | 6.77433300  | -0.63815200 | -0.31833700 |
| C  | -8.76215300 | 0.09914400  | -1.45867300 |
| H  | -9.30317300 | -0.65035100 | -0.87230300 |
| H  | -9.43082000 | 0.94457600  | -1.64688200 |
| H  | -8.47590100 | -0.34106200 | -2.41808900 |
| C  | -7.85866500 | 1.16746500  | 0.66878200  |
| H  | -8.39368700 | 0.42984700  | 1.27515100  |
| H  | -6.95416400 | 1.46861400  | 1.20580300  |
| H  | -8.49579800 | 2.04888100  | 0.54728400  |
| C  | 7.65026800  | 1.10982900  | 1.14424400  |
| H  | 8.09470000  | 0.36891600  | 1.81750800  |
| H  | 8.26393600  | 2.01652700  | 1.16921100  |
| H  | 6.65311300  | 1.35944500  | 1.51848500  |
| C  | 8.96159700  | 0.11840400  | -0.79101100 |
| H  | 9.64724600  | 0.97163400  | -0.80351800 |
| H  | 9.38226200  | -0.65667700 | -0.14124500 |
| H  | 8.88177400  | -0.28274500 | -1.80596700 |

**Oxidized [CrN(Sal)<sup>NO2</sup>]<sup>+</sup>, triplet**

|    |             |             |             |
|----|-------------|-------------|-------------|
| H  | 3.16116900  | -5.26306100 | -0.23785700 |
| H  | -3.25764000 | -5.26399800 | 0.29743100  |
| H  | -1.23616300 | -4.37135500 | -0.71581800 |
| H  | 4.29263800  | -4.31413000 | 0.73338100  |
| H  | 1.26585000  | -4.32807100 | 0.94120500  |
| C  | 3.70167700  | -4.31210400 | -0.18966100 |
| H  | -4.26246200 | -4.34975500 | -0.82979400 |
| H  | 4.38754400  | -4.28173500 | -1.04369000 |
| H  | 1.36181800  | -4.21222000 | -1.59322900 |
| C  | -3.78007200 | -4.31363600 | 0.15326900  |
| H  | -2.13847500 | -3.34267400 | -1.84416900 |
| H  | -4.55474100 | -4.24413700 | 0.92478400  |
| H  | -1.63212800 | -4.21502200 | 1.78414100  |
| C  | -1.68497600 | -3.38129800 | -0.84766800 |
| H  | 2.29576300  | -3.27733400 | 1.93114300  |
| C  | 1.73529200  | -3.33893700 | 0.99115300  |
| C  | 1.89523400  | -3.25594000 | -1.54906000 |
| C  | 2.68319900  | -3.15564300 | -0.21937800 |
| H  | 2.57897200  | -3.20729000 | -2.40428600 |
| C  | -2.75689300 | -3.16602700 | 0.25361500  |
| H  | -0.89079400 | -2.63923200 | -0.79058200 |
| C  | -2.09966700 | -3.23269000 | 1.65980600  |
| H  | 0.94607000  | -2.58868200 | 1.00887000  |
| H  | 5.38552300  | -2.54307100 | -0.14214200 |
| H  | 1.16381500  | -2.45215100 | -1.64684600 |
| H  | -5.42620700 | -2.53559100 | -0.21853900 |
| H  | -2.85355200 | -3.11168800 | 2.44510100  |
| H  | -1.33061100 | -2.47053100 | 1.79074700  |
| C  | 3.37463200  | -1.78450500 | -0.16313000 |
| C  | 4.75472700  | -1.66615700 | -0.15166400 |
| C  | -3.41876000 | -1.80365200 | 0.06618900  |
| C  | -4.78270700 | -1.67015500 | -0.15675200 |
| O  | 1.30421200  | -0.62151300 | -0.11578900 |
| C  | 2.60714100  | -0.56583000 | -0.13688900 |
| O  | -1.37243200 | -0.65449100 | 0.30036700  |
| C  | -2.62902900 | -0.56965100 | 0.13067100  |
| C  | 5.39427400  | -0.41457800 | -0.15874900 |
| N  | 6.85291300  | -0.36150900 | -0.15202300 |
| C  | -5.37011300 | -0.41212300 | -0.30742900 |
| N  | -6.82213400 | -0.33468000 | -0.55273900 |
| Cr | 0.06971200  | 0.65924200  | 0.55314100  |
| N  | 0.28208200  | 0.71418900  | 2.05162400  |

|   |             |             |             |
|---|-------------|-------------|-------------|
| C | 3.27990100  | 0.70603000  | -0.17157200 |
| C | 4.67920200  | 0.76639300  | -0.19276800 |
| C | -3.28254400 | 0.72788900  | -0.00843000 |
| C | -4.64597500 | 0.78320000  | -0.23336800 |
| H | 5.19676900  | 1.71754400  | -0.22996800 |
| H | -5.16103900 | 1.72902500  | -0.35000100 |
| C | 2.56098700  | 1.94978000  | -0.29306300 |
| C | -2.56777300 | 1.99095100  | 0.07803500  |
| N | 1.28597000  | 2.10606700  | -0.13335100 |
| N | -1.30715000 | 2.12629100  | 0.29767700  |
| H | 3.16491900  | 2.81314900  | -0.56813100 |
| H | -3.18952700 | 2.87656400  | -0.04254100 |
| C | 0.61534800  | 3.39718100  | -0.42964600 |
| H | 0.29665000  | 3.33677300  | -1.47992000 |
| C | -0.66258600 | 3.45209900  | 0.43260300  |
| H | -0.35246100 | 3.50554500  | 1.48520200  |
| H | 1.82619100  | 4.68900200  | 0.80099000  |
| C | 1.45823200  | 4.66247700  | -0.23308100 |
| H | 2.33053300  | 4.64973900  | -0.89365900 |
| H | -2.39124100 | 4.72097600  | 0.74951900  |
| C | -1.50980800 | 4.68096900  | 0.10048400  |
| H | -1.86010000 | 4.62014400  | -0.93872800 |
| C | -0.66895600 | 5.95450900  | 0.29567800  |
| C | 0.61652600  | 5.91314300  | -0.53856200 |
| H | -0.41545400 | 6.05942700  | 1.35897100  |
| H | 0.35974600  | 5.92147000  | -1.60666300 |
| H | 1.22039500  | 6.80717500  | -0.35102700 |
| H | -1.27065300 | 6.82841100  | 0.02517800  |
| O | -7.30794400 | 0.78288000  | -0.72251000 |
| O | -7.45407600 | -1.38823700 | -0.57413000 |
| O | 7.39359800  | 0.74830200  | -0.16259500 |
| O | 7.47351100  | -1.42790300 | -0.13616400 |

**Oxidized [CrN(Sal)<sup>H</sup>]<sup>+</sup>, triplet**

|   |             |             |             |
|---|-------------|-------------|-------------|
| O | 0.82642600  | -1.30213600 | 0.16640600  |
| N | -1.94689200 | -1.47949900 | 0.18477300  |
| C | 0.84757300  | -2.55897800 | -0.04394400 |
| O | 0.54731400  | 1.35058000  | -0.15317100 |
| N | -2.15202300 | 1.11660400  | -0.13718200 |
| C | 2.14128700  | -3.24015500 | -0.14012700 |
| C | 2.11736900  | -4.60228200 | -0.41275800 |
| H | 3.04632500  | -5.15061500 | -0.49670500 |
| C | 0.92162900  | -5.31595600 | -0.58306100 |

|   |             |             |             |
|---|-------------|-------------|-------------|
| C | -0.32237400 | -4.67398900 | -0.47255100 |
| H | -1.23670500 | -5.24580600 | -0.59935300 |
| C | -0.38787600 | -3.31666000 | -0.20026400 |
| C | 3.44275400  | -2.46834800 | 0.07814800  |
| C | 3.45355000  | -1.87042400 | 1.51094400  |
| H | 4.39195200  | -1.32643900 | 1.66368800  |
| H | 3.39482700  | -2.66582700 | 2.26232800  |
| H | 2.62807300  | -1.17573600 | 1.67066900  |
| C | 3.56654200  | -1.33553500 | -0.97316500 |
| H | 2.75913900  | -0.61140700 | -0.88385000 |
| H | 3.56560900  | -1.74668400 | -1.98901000 |
| H | 4.51476600  | -0.80863900 | -0.82124500 |
| C | 4.67725400  | -3.38029500 | -0.06162900 |
| H | 5.57831100  | -2.78186600 | 0.10473600  |
| H | 4.75326800  | -3.81814800 | -1.06321600 |
| H | 4.67894500  | -4.18942300 | 0.67708400  |
| C | -1.70375400 | -2.71440300 | -0.08414300 |
| H | -2.53487000 | -3.40343800 | -0.22761200 |
| C | -3.32195400 | -0.95786800 | 0.34524300  |
| H | -3.39905600 | -0.69231200 | 1.40869800  |
| C | -4.47636400 | -1.89387400 | -0.01439400 |
| H | -4.43567300 | -2.80007300 | 0.59994900  |
| H | -4.39426700 | -2.19953600 | -1.06622000 |
| C | -5.81511800 | -1.17241400 | 0.21819300  |
| H | -6.63837000 | -1.83505700 | -0.06917900 |
| H | -5.93144700 | -0.96715800 | 1.29088800  |
| C | -5.88930400 | 0.14244500  | -0.56683800 |
| H | -6.83078200 | 0.65982300  | -0.35318700 |
| H | -5.88400700 | -0.07430300 | -1.64393100 |
| C | -4.71214600 | 1.07502000  | -0.23550500 |
| H | -4.77775400 | 1.96962200  | -0.86253700 |
| H | -4.76316100 | 1.40202000  | 0.81148500  |
| C | -3.37921200 | 0.35241300  | -0.46581300 |
| H | -3.29856400 | 0.08114200  | -1.52848000 |
| C | -2.10151000 | 2.40875400  | -0.25370500 |
| H | -3.01577600 | 2.94285900  | -0.51029900 |
| C | -0.92925300 | 3.22489700  | -0.10774600 |
| C | -1.09991100 | 4.62603400  | -0.07714600 |
| H | -2.10506300 | 5.03920200  | -0.08781100 |
| C | 0.00249900  | 5.45274100  | -0.02375000 |
| C | 1.29282300  | 4.89067000  | -0.04406700 |
| H | 2.13393900  | 5.57287300  | -0.01686100 |
| C | 1.53156400  | 3.51998500  | -0.10442500 |
| C | 0.38707200  | 2.65776000  | -0.10635700 |

|    |             |             |             |
|----|-------------|-------------|-------------|
| C  | 2.95551200  | 2.94386800  | -0.19046200 |
| C  | 3.21912400  | 1.96269700  | 0.97742400  |
| H  | 3.12261200  | 2.47829900  | 1.94030500  |
| H  | 4.23954800  | 1.56759400  | 0.90621600  |
| H  | 2.52657800  | 1.12244800  | 0.96415100  |
| C  | 3.11755200  | 2.22311400  | -1.55123100 |
| H  | 3.01660800  | 2.93775400  | -2.37658200 |
| H  | 2.36915800  | 1.43983000  | -1.68101800 |
| H  | 4.11089000  | 1.76379200  | -1.61808100 |
| C  | 4.03154700  | 4.04525800  | -0.11677700 |
| H  | 3.94749200  | 4.76191900  | -0.94155700 |
| H  | 5.02187200  | 3.58206300  | -0.18477600 |
| H  | 3.98857500  | 4.59745800  | 0.82912500  |
| Cr | -0.60313300 | 0.01133600  | 0.51199000  |
| N  | -0.65845800 | 0.16512600  | 2.02014000  |
| H  | 0.95794400  | -6.37894600 | -0.79627400 |
| H  | -0.11530000 | 6.53062200  | 0.02013100  |

**Oxidized [CrN(Sal)<sup>OMe</sup>]<sup>+</sup>, triplet**

|   |             |             |             |
|---|-------------|-------------|-------------|
| H | -3.25210400 | -5.21144800 | 0.17484700  |
| H | 3.15753600  | -5.19418100 | -0.17657900 |
| H | -1.62921900 | -4.18178000 | 1.68825800  |
| H | 1.22153400  | -4.22769100 | 0.92332100  |
| H | 1.40406100  | -4.17004600 | -1.60371500 |
| H | -1.24191900 | -4.29707800 | -0.82358700 |
| C | -3.77813100 | -4.25960100 | 0.05257000  |
| H | -4.55189300 | -4.21118100 | 0.82711300  |
| C | 3.69963000  | -4.24324900 | -0.13382900 |
| H | -4.26340900 | -4.27639000 | -0.93006900 |
| H | 4.40766500  | -4.23266100 | -0.97051800 |
| H | 4.26814300  | -4.22925700 | 0.80342300  |
| C | -2.10632900 | -3.20172700 | 1.57868000  |
| C | 1.70557300  | -3.24481700 | 0.97293000  |
| C | 1.93423800  | -3.21117600 | -1.55858100 |
| H | -2.86311600 | -3.10188500 | 2.36493100  |
| C | -1.68990900 | -3.30290900 | -0.92844200 |
| H | 2.64020400  | -3.17291800 | -2.39675300 |
| H | 2.24210300  | -3.17962800 | 1.92706200  |
| H | -2.14340500 | -3.23879700 | -1.92435400 |
| C | -2.76028600 | -3.10914900 | 0.17520200  |
| C | 2.68743100  | -3.08311600 | -0.21229500 |
| H | -1.34488300 | -2.43510600 | 1.72567600  |
| H | 0.92978500  | -2.48067900 | 0.95876700  |

|    |             |             |             |
|----|-------------|-------------|-------------|
| H  | 1.20476400  | -2.40992900 | -1.68485600 |
| H  | -0.89401500 | -2.56412200 | -0.85377300 |
| H  | -5.40497300 | -2.49636800 | -0.23821300 |
| H  | 5.35549000  | -2.49256100 | -0.07917400 |
| H  | -7.58094000 | -1.87799100 | 0.33496300  |
| H  | -7.33873700 | -1.92216000 | -1.44648400 |
| H  | 7.46185100  | -2.01314000 | -0.88351900 |
| H  | 7.38178400  | -1.96662500 | 0.90482700  |
| C  | -3.42916900 | -1.73911300 | 0.01750700  |
| C  | 3.37233700  | -1.70497900 | -0.15665900 |
| C  | -4.78895000 | -1.61138800 | -0.18008000 |
| C  | 4.76183600  | -1.59051400 | -0.11042100 |
| C  | -7.60691900 | -1.29574600 | -0.59070100 |
| C  | 7.59663900  | -1.37973400 | 0.00266300  |
| H  | -8.59685900 | -0.86697800 | -0.73613100 |
| H  | 8.62851400  | -1.02715400 | 0.03943900  |
| O  | -1.36772900 | -0.60909600 | 0.25070600  |
| O  | 1.27889100  | -0.55492100 | -0.22190300 |
| C  | -2.62965100 | -0.51585400 | 0.09374600  |
| C  | 2.60293800  | -0.50318500 | -0.16997700 |
| C  | -5.41389000 | -0.34695600 | -0.30488500 |
| C  | 5.43088000  | -0.35027000 | -0.10867800 |
| O  | -6.71707600 | -0.16435800 | -0.49760100 |
| O  | 6.78920700  | -0.20726500 | -0.06343900 |
| Cr | 0.08417400  | 0.69107200  | 0.52350400  |
| N  | 0.33198600  | 0.72467900  | 2.02048300  |
| C  | -3.28488500 | 0.77670100  | -0.02051600 |
| C  | 3.28171000  | 0.75478700  | -0.18568600 |
| C  | -4.64837600 | 0.84000500  | -0.22168900 |
| C  | 4.68884000  | 0.81616000  | -0.16885800 |
| H  | -5.16326700 | 1.79058000  | -0.31658400 |
| H  | 5.20008700  | 1.77393700  | -0.19004800 |
| C  | -2.56335600 | 2.03782200  | 0.06773200  |
| C  | 2.56514000  | 1.99401800  | -0.32813000 |
| N  | 1.28755400  | 2.15095400  | -0.16997800 |
| N  | -1.30099200 | 2.16897000  | 0.27418500  |
| H  | 3.16671000  | 2.85666100  | -0.61283800 |
| H  | -3.18411300 | 2.92632000  | -0.04111800 |
| H  | 0.27948100  | 3.36440300  | -1.52556500 |
| C  | 0.61249400  | 3.43306900  | -0.47960700 |
| C  | -0.65364100 | 3.49413500  | 0.39838800  |
| H  | -0.32782100 | 3.55192900  | 1.44605800  |
| H  | -1.87108100 | 4.65873500  | -0.95857200 |
| H  | 2.31754900  | 4.68447500  | -0.98217700 |

|   |             |            |             |
|---|-------------|------------|-------------|
| C | 1.45502700  | 4.70298100 | -0.30871800 |
| C | -1.50402500 | 4.72349200 | 0.07481500  |
| H | -2.37654800 | 4.76693800 | 0.73600100  |
| H | 1.84025400  | 4.73875900 | 0.71901400  |
| H | 0.33090400  | 5.95093900 | -1.67177700 |
| C | 0.60892100  | 5.95129900 | -0.60875500 |
| C | -0.66085700 | 5.99804200 | 0.24902400  |
| H | -0.38642400 | 6.10714800 | 1.30691300  |
| H | 1.21511000  | 6.84796800 | -0.44051600 |
| H | -1.26670100 | 6.87197600 | -0.01322900 |

**Oxidized [CrN(Sal)<sup>OiPr</sup>]<sup>+</sup>, triplet.**

|   |             |             |             |
|---|-------------|-------------|-------------|
| O | -1.36141700 | -0.80058100 | 0.26544900  |
| N | -1.30014000 | 1.97167900  | 0.27835100  |
| C | -2.62662800 | -0.71345100 | 0.13227000  |
| O | 1.28125900  | -0.75042900 | -0.23015200 |
| N | 1.28079800  | 1.95388800  | -0.19839300 |
| C | -3.42327500 | -1.93974400 | 0.07928200  |
| C | -4.77643800 | -1.80534200 | -0.10399900 |
| H | -5.42769100 | -2.66823700 | -0.15334600 |
| C | -5.41941300 | -0.54132700 | -0.23505900 |
| C | -4.66045800 | 0.64683500  | -0.16540200 |
| H | -5.13669500 | 1.61539900  | -0.25323700 |
| C | -3.28839800 | 0.57582900  | 0.02058400  |
| C | -2.75169200 | -3.30795400 | 0.24634300  |
| C | -2.07387400 | -3.38064400 | 1.63879400  |
| H | -1.59729400 | -4.36005200 | 1.75688600  |
| H | -2.81649200 | -3.26545900 | 2.43651300  |
| H | -1.30765300 | -2.61403300 | 1.76065100  |
| C | -1.70125500 | -3.51931200 | -0.87187300 |
| H | -0.90574000 | -2.77765000 | -0.82378200 |
| H | -2.17219500 | -3.47234400 | -1.86067600 |
| H | -1.24853800 | -4.51058300 | -0.75906000 |
| C | -3.77509400 | -4.45637300 | 0.15855900  |
| H | -3.25071100 | -5.40862600 | 0.28610900  |
| H | -4.27792800 | -4.48473400 | -0.81480100 |
| H | -4.53577400 | -4.39173600 | 0.94465400  |
| C | -2.56624300 | 1.83622200  | 0.09246200  |
| H | -3.18748900 | 2.72507100  | -0.01050200 |
| C | -0.65425000 | 3.29876600  | 0.38548100  |
| H | -0.31522300 | 3.36453800  | 1.42853700  |
| C | -1.51045700 | 4.52466200  | 0.06403400  |
| H | -2.37474200 | 4.57173200  | 0.73572800  |

|    |             |             |             |
|----|-------------|-------------|-------------|
| H  | -1.89038700 | 4.45237200  | -0.96420000 |
| C  | -0.66689300 | 5.80154900  | 0.21883700  |
| H  | -1.27699900 | 6.67289000  | -0.04222800 |
| H  | -0.37971600 | 5.91852700  | 1.27249800  |
| C  | 0.59247400  | 5.75034100  | -0.65387400 |
| H  | 1.19903000  | 6.64931800  | -0.49975100 |
| H  | 0.30150200  | 5.74159400  | -1.71340400 |
| C  | 1.44400900  | 4.50547200  | -0.35497700 |
| H  | 2.29849900  | 4.48364600  | -1.03855600 |
| H  | 1.84143700  | 4.54902000  | 0.66782000  |
| C  | 0.60130600  | 3.23327300  | -0.50754600 |
| H  | 0.25485800  | 3.15941700  | -1.54890800 |
| C  | 2.55803500  | 1.79666000  | -0.37564200 |
| H  | 3.15208200  | 2.66149400  | -0.66976300 |
| C  | 3.27971600  | 0.56223000  | -0.24667400 |
| C  | 4.69528300  | 0.63209100  | -0.26365800 |
| H  | 5.16739800  | 1.60698000  | -0.29348900 |
| C  | 5.43315100  | -0.53510900 | -0.22522500 |
| C  | 4.75502000  | -1.77616100 | -0.20994100 |
| H  | 5.38706300  | -2.65550500 | -0.19463500 |
| C  | 3.37453200  | -1.90094700 | -0.22303900 |
| C  | 2.60254300  | -0.69277900 | -0.21535400 |
| C  | 2.68982200  | -3.27846900 | -0.26170500 |
| C  | 1.73821400  | -3.44188900 | 0.94775700  |
| H  | 2.29797600  | -3.37312600 | 1.88819900  |
| H  | 1.25765100  | -4.42697100 | 0.91131400  |
| H  | 0.95856800  | -2.68143400 | 0.95205900  |
| C  | 1.90355100  | -3.40684500 | -1.58879300 |
| H  | 2.58833600  | -3.36762600 | -2.44428900 |
| H  | 1.16978100  | -2.60679300 | -1.69680200 |
| H  | 1.37372600  | -4.36635100 | -1.62066600 |
| C  | 3.70786500  | -4.43451900 | -0.20888700 |
| H  | 4.39565200  | -4.41892800 | -1.06198600 |
| H  | 3.16878700  | -5.38768100 | -0.23927900 |
| H  | 4.29917700  | -4.41762300 | 0.71391300  |
| Cr | 0.08931700  | 0.50020200  | 0.51862300  |
| N  | 0.35311700  | 0.54148700  | 2.01298300  |
| C  | -7.57600000 | 0.59529400  | -0.52099700 |
| H  | -7.04388100 | 1.33329600  | -1.13023200 |
| C  | 7.60961100  | 0.55786600  | -0.17055700 |
| H  | 7.20106100  | 1.29980300  | -0.86993100 |
| O  | -6.73174800 | -0.60298100 | -0.41949200 |
| O  | 6.79324700  | -0.63357300 | -0.22718200 |
| C  | -8.82645700 | 0.13445600  | -1.25160000 |

|   |             |             |             |
|---|-------------|-------------|-------------|
| H | -9.34274000 | -0.63927500 | -0.67459000 |
| H | -9.50461900 | 0.98299700  | -1.38333800 |
| H | -8.57339600 | -0.26765900 | -2.23668700 |
| C | -7.84902500 | 1.12676800  | 0.88096800  |
| H | -8.36186100 | 0.36573900  | 1.47742000  |
| H | -6.92533600 | 1.40816200  | 1.39574400  |
| H | -8.48990100 | 2.01144100  | 0.81639700  |
| C | 7.63299700  | 1.12074700  | 1.24968100  |
| H | 8.06535300  | 0.38322200  | 1.93448100  |
| H | 8.24328700  | 2.02942400  | 1.28493500  |
| H | 6.62748300  | 1.36842100  | 1.60220700  |
| C | 8.98825600  | 0.12738200  | -0.65353100 |
| H | 9.67204000  | 0.98223800  | -0.65247400 |
| H | 9.39633000  | -0.64546300 | 0.00689200  |
| H | 8.93195500  | -0.27602800 | -1.66918600 |

Predicted TD-DFT transitions:

**Oxidized [CrN(Sal)<sup>OiPr</sup>]<sup>+</sup>, triplet:**

Excited State 1: 3.113-A 2.0375 eV 608.51 nm f=0.0239 <S\*\*2>=2.173

|              |         |
|--------------|---------|
| 159B -> 164B | 0.18413 |
| 160B -> 164B | 0.71615 |
| 161B -> 164B | 0.42077 |
| 163B -> 164B | 0.44385 |

This state for optimization and/or second-order correction.

Total Energy, E(TD-HF/TD-DFT) = -2834.11886744

Copying the excited state density for this state as the 1-particle RhoCI density.

Excited State 2: 3.124-A 2.1699 eV 571.39 nm f=0.0227 <S\*\*2>=2.190

|              |          |
|--------------|----------|
| 165A -> 167A | -0.11250 |
| 159B -> 164B | -0.32438 |
| 160B -> 164B | -0.34197 |
| 161B -> 164B | -0.12432 |
| 163B -> 164B | 0.83034  |
| 163B -> 166B | -0.11468 |

Excited State 3: 4.112-A 2.3261 eV 533.01 nm f=0.0018 <S\*\*2>=3.977

|              |          |
|--------------|----------|
| 163A -> 167A | -0.12096 |
| 165A -> 167A | 0.66201  |
| 162B -> 166B | -0.11254 |
| 163B -> 164B | 0.15842  |

163B -> 165B 0.23168  
163B -> 166B 0.60797

Excited State 4: 3.085-A 2.6018 eV 476.53 nm f=0.0047 <S\*\*2>=2.130

152A -> 171A -0.13198  
154A -> 171A -0.17462  
155A -> 171A -0.16017  
158A -> 171A 0.18242  
159A -> 167A -0.12467  
159A -> 169A -0.16788  
159A -> 171A -0.27046  
162A -> 167A -0.27671  
162A -> 169A -0.31879  
162A -> 170A 0.12770  
162A -> 171A -0.50483  
162A -> 172A 0.16475  
162A -> 173A 0.11971  
165A -> 171A 0.12130

Excited State 5: 3.122-A 2.7019 eV 458.87 nm f=0.0060 <S\*\*2>=2.186

133B -> 164B -0.10805  
135B -> 164B 0.10287  
137B -> 164B -0.12192  
148B -> 164B 0.14732  
153B -> 164B -0.13098  
156B -> 164B 0.24871  
157B -> 164B 0.72236  
157B -> 165B 0.12295  
158B -> 164B -0.32978  
159B -> 164B 0.22411  
163B -> 164B 0.18362

Excited State 6: 3.351-A 2.8274 eV 438.51 nm f=0.2020 <S\*\*2>=2.558

156A -> 169A -0.10623  
160A -> 166A 0.13576  
161A -> 166A 0.22307  
164A -> 166A -0.15854  
164A -> 168A -0.10886  
149B -> 164B 0.12637  
153B -> 164B -0.13368  
157B -> 164B 0.39035  
158B -> 164B 0.57809  
159B -> 164B -0.29621  
160B -> 165B -0.13301

161B -> 164B 0.11718  
163B -> 164B -0.10400

Excited State 7: 3.875-A 2.9900 eV 414.66 nm f=0.0360 <S\*\*2>=3.504

143A -> 169A -0.11842  
151A -> 170A 0.10451  
156A -> 169A -0.25491  
156A -> 170A -0.10100  
157A -> 170A 0.10520  
158A -> 169A 0.13769  
158A -> 170A -0.15343  
160A -> 170A 0.11824  
161A -> 169A -0.12156  
162A -> 169A 0.22253  
163A -> 167A -0.10871  
164A -> 166A 0.21415  
164A -> 170A -0.13768  
145B -> 169B -0.10727  
149B -> 164B -0.13101  
151B -> 168B -0.11157  
151B -> 170B 0.13494  
154B -> 169B -0.11046  
155B -> 169B -0.10980  
156B -> 169B -0.11294  
158B -> 164B -0.23516  
159B -> 164B 0.10684  
159B -> 170B 0.10438  
161B -> 169B 0.13074  
162B -> 166B -0.10531

Excited State 8: 3.413-A 3.1461 eV 394.09 nm f=0.0123 <S\*\*2>=2.663

161A -> 166A 0.16643  
162A -> 169A 0.10553  
163A -> 167A 0.19512  
164A -> 166A 0.72855  
165A -> 166A 0.24420  
165A -> 167A -0.12657  
165A -> 173A -0.10144  
160B -> 165B -0.13427  
162B -> 166B 0.17278  
163B -> 166B 0.23925

Excited State 9: 4.017-A 3.1821 eV 389.64 nm f=0.0120 <S\*\*2>=3.783

163A -> 167A 0.44777

163A -> 173A -0.12489  
164A -> 166A -0.27559  
165A -> 166A -0.11399  
165A -> 171A -0.13650  
165A -> 173A -0.26144  
162B -> 165B 0.14946  
162B -> 166B 0.44326  
163B -> 166B 0.14600  
163B -> 167B 0.13210  
163B -> 171B -0.17298  
163B -> 173B 0.20499

Excited State 10: 3.127-A 3.2837 eV 377.58 nm f=0.1432 <S\*\*2>=2.195

163A -> 167A 0.10972  
164A -> 166A 0.20476  
165A -> 167A 0.66507  
162B -> 166B 0.10521  
163B -> 165B -0.24964  
163B -> 166B -0.58257

Excited State 11: 3.146-A 3.3179 eV 373.69 nm f=0.0107 <S\*\*2>=2.225

152A -> 170A 0.12537  
154A -> 170A 0.14697  
155A -> 170A 0.14591  
158A -> 170A -0.10424  
159A -> 168A 0.15394  
159A -> 170A 0.23640  
162A -> 166A 0.17808  
162A -> 167A -0.13571  
162A -> 168A 0.37618  
162A -> 170A 0.55515  
162A -> 171A 0.13775  
164A -> 166A 0.19497  
164A -> 170A -0.11337  
165A -> 168A -0.14248  
165A -> 170A -0.20749

Excited State 12: 3.205-A 3.4053 eV 364.10 nm f=0.0011 <S\*\*2>=2.318

152A -> 169A 0.13670  
154A -> 169A 0.15927  
155A -> 169A 0.14727  
158A -> 169A -0.14521  
159A -> 169A 0.25335  
159A -> 170A 0.10997

162A -> 166A -0.15240  
162A -> 169A 0.54540  
162A -> 170A 0.15907  
162A -> 171A -0.21129  
162A -> 172A 0.17149  
164A -> 166A -0.17378  
164A -> 169A -0.11270  
165A -> 169A -0.20663  
165A -> 171A 0.10865  
163B -> 167B 0.10152

Excited State 13: 3.208-A 3.6326 eV 341.31 nm f=0.0007 <S\*\*2>=2.323

156A -> 169A -0.12113  
151B -> 164B 0.11637  
155B -> 164B -0.14256  
156B -> 164B -0.16610  
159B -> 164B 0.10563  
159B -> 167B 0.12408  
161B -> 164B 0.19954  
162B -> 164B 0.72506  
163B -> 167B -0.40068

Excited State 14: 3.198-A 3.6550 eV 339.22 nm f=0.0123 <S\*\*2>=2.308

163A -> 167A -0.10363  
156B -> 164B -0.10486  
159B -> 167B -0.19516  
161B -> 164B 0.15215  
161B -> 167B 0.14148  
162B -> 164B 0.41592  
162B -> 166B -0.10133  
163B -> 167B 0.74077

Excited State 15: 3.727-A 3.7527 eV 330.39 nm f=0.0140 <S\*\*2>=3.223

156A -> 169A -0.25042  
158A -> 169A 0.21428  
159A -> 169A -0.17567  
160A -> 169A 0.10517  
160A -> 170A -0.13266  
161A -> 166A 0.22251  
161A -> 169A -0.16522  
162A -> 169A -0.10920  
164A -> 166A -0.19713  
164A -> 168A 0.17478  
165A -> 166A 0.20335

165A -> 168A 0.12623  
165A -> 169A -0.16903  
165A -> 170A 0.14877  
158B -> 164B -0.12623  
160B -> 165B -0.12438  
161B -> 165B -0.13147  
162B -> 164B -0.23029  
163B -> 165B -0.16431  
163B -> 167B 0.18040

Excited State 16: 3.843-A 3.7797 eV 328.02 nm f=0.0011 <S\*\*2>=3.442

150A -> 169A -0.15650  
151A -> 169A -0.15394  
156A -> 168A 0.13137  
156A -> 170A 0.21743  
157A -> 169A -0.12702  
158A -> 167A 0.10123  
158A -> 168A -0.11667  
158A -> 169A 0.13791  
158A -> 170A -0.19028  
159A -> 169A 0.10353  
159A -> 170A 0.12344  
160A -> 166A 0.16421  
160A -> 169A -0.21491  
161A -> 166A 0.13326  
161A -> 169A 0.13688  
161A -> 170A 0.13265  
163A -> 169A -0.12933  
164A -> 168A 0.12845  
164A -> 169A 0.13020  
165A -> 166A -0.11604  
165A -> 169A 0.22692  
160B -> 165B -0.11378  
161B -> 164B -0.21205  
163B -> 167B -0.11624

Excited State 17: 3.721-A 3.8551 eV 321.61 nm f=0.0228 <S\*\*2>=3.212

156A -> 170A -0.13055  
158A -> 166A 0.10028  
158A -> 169A -0.14686  
158A -> 170A 0.11883  
160A -> 166A 0.20675  
160A -> 170A 0.12041  
161A -> 166A 0.29947

161A -> 168A -0.12844  
161A -> 170A -0.10974  
164A -> 166A -0.19529  
164A -> 168A 0.30279  
164A -> 170A -0.19153  
165A -> 170A -0.22439  
158B -> 164B -0.22076  
160B -> 165B -0.26060  
161B -> 165B -0.12845  
162B -> 164B -0.12065

Excited State 18: 3.397-A 3.9333 eV 315.21 nm f=0.0024 <S\*\*2>=2.635

152A -> 169A -0.11183  
153A -> 169A -0.13597  
156A -> 169A -0.11833  
160A -> 169A -0.11128  
165A -> 166A -0.28437  
165A -> 169A 0.18409  
153B -> 164B 0.18346  
155B -> 164B -0.10434  
160B -> 164B -0.28671  
161B -> 164B 0.57456  
162B -> 164B -0.33031

Excited State 19: 3.720-A 3.9619 eV 312.94 nm f=0.0088 <S\*\*2>=3.209

153A -> 170A -0.10019  
156A -> 169A 0.19049  
157A -> 170A 0.10195  
158A -> 168A -0.18227  
158A -> 170A -0.26187  
164A -> 166A -0.11136  
164A -> 170A -0.17376  
165A -> 166A 0.37862  
165A -> 168A 0.15285  
165A -> 170A 0.14800  
165A -> 171A 0.16541  
149B -> 164B -0.10699  
160B -> 164B -0.20359  
161B -> 164B 0.38844  
162B -> 166B 0.10819  
163B -> 171B 0.11163

Excited State 20: 4.048-A 4.0027 eV 309.75 nm f=0.0021 <S\*\*2>=3.846

156A -> 169A -0.10013

|              |          |
|--------------|----------|
| 163A -> 167A | 0.28937  |
| 165A -> 169A | 0.23166  |
| 165A -> 171A | 0.26654  |
| 165A -> 173A | 0.40254  |
| 165A -> 177A | 0.10186  |
| 161B -> 164B | -0.17443 |
| 162B -> 165B | 0.10861  |
| 162B -> 166B | 0.29743  |
| 163B -> 167B | 0.10201  |
| 163B -> 169B | -0.12683 |
| 163B -> 171B | 0.29935  |
| 163B -> 172B | 0.14734  |
| 163B -> 173B | -0.27639 |

Excited State 21: 3.796-A 4.0855 eV 303.47 nm f=0.0009 <S\*\*2>=3.352

|              |          |
|--------------|----------|
| 150A -> 170A | 0.11205  |
| 152A -> 168A | 0.11356  |
| 152A -> 170A | 0.18292  |
| 153A -> 168A | 0.13202  |
| 153A -> 170A | 0.20512  |
| 156A -> 168A | 0.11010  |
| 156A -> 169A | 0.10853  |
| 156A -> 170A | 0.14100  |
| 157A -> 169A | -0.10407 |
| 158A -> 169A | 0.21526  |
| 158A -> 170A | 0.13571  |
| 160A -> 170A | 0.12851  |
| 164A -> 169A | 0.15557  |
| 164A -> 170A | 0.14565  |
| 165A -> 166A | 0.35820  |
| 165A -> 168A | -0.10475 |
| 165A -> 169A | -0.13324 |
| 165A -> 170A | -0.23914 |
| 165A -> 171A | 0.15905  |
| 149B -> 164B | 0.18968  |
| 149B -> 169B | 0.12561  |
| 154B -> 164B | 0.11876  |
| 158B -> 169B | -0.11580 |
| 161B -> 164B | 0.15923  |

Excited State 22: 3.732-A 4.1574 eV 298.23 nm f=0.0122 <S\*\*2>=3.231

|              |          |
|--------------|----------|
| 150A -> 169A | -0.13055 |
| 152A -> 169A | -0.19179 |
| 153A -> 169A | -0.20475 |

158A -> 169A -0.23812  
160A -> 166A -0.10267  
160A -> 169A -0.13944  
163A -> 167A -0.11589  
164A -> 166A -0.11816  
164A -> 169A -0.12169  
165A -> 166A 0.51030  
165A -> 169A 0.18588  
165A -> 171A 0.10448  
165A -> 173A -0.17715  
163B -> 165B 0.13854  
163B -> 171B -0.12401  
163B -> 172B -0.11050  
163B -> 173B 0.11650

Excited State 23: 3.138-A 4.1951 eV 295.55 nm f=0.0012 <S\*\*2>=2.212

127B -> 164B 0.13793  
130B -> 164B -0.18245  
133B -> 164B 0.11278  
135B -> 164B -0.10118  
137B -> 164B 0.11862  
142B -> 164B -0.34418  
143B -> 164B -0.10517  
146B -> 164B 0.10389  
147B -> 164B 0.17160  
148B -> 164B 0.61940  
149B -> 164B 0.16008  
152B -> 164B -0.16815  
155B -> 164B -0.15536  
156B -> 164B 0.25498  
157B -> 164B -0.12810  
163B -> 165B 0.16053

Excited State 24: 3.487-A 4.2536 eV 291.48 nm f=0.0002 <S\*\*2>=2.789

161A -> 166A 0.12965  
164A -> 168A 0.20958  
165A -> 169A -0.15658  
142B -> 164B 0.13753  
148B -> 164B -0.13856  
149B -> 164B -0.12243  
151B -> 164B -0.11375  
152B -> 164B 0.10324  
155B -> 164B 0.20237  
156B -> 164B 0.10085

159B -> 165B -0.16726  
163B -> 165B 0.58101  
163B -> 166B -0.23157  
163B -> 168B 0.20935  
163B -> 169B -0.13340  
163B -> 173B -0.13105

Excited State 25: 3.302-A 4.3201 eV 286.99 nm f=0.0152 <S\*\*2>=2.477

158A -> 170A 0.20485  
164A -> 168A 0.21841  
165A -> 169A 0.20732  
165A -> 170A -0.14601  
165A -> 171A 0.11428  
165A -> 172A -0.11372  
143B -> 164B -0.10932  
145B -> 164B 0.14838  
149B -> 164B -0.19237  
151B -> 164B -0.15097  
152B -> 164B 0.20004  
153B -> 164B -0.13001  
155B -> 164B 0.33125  
156B -> 164B 0.31250  
157B -> 164B -0.12369  
158B -> 164B 0.12016  
160B -> 164B -0.13604  
163B -> 165B -0.15822

**Oxidized [CrN(Sal)<sup>OiPr</sup>]<sup>+</sup>, broken symmetry singlet:**

Excited State 1: 2.337-A 1.9689 eV 629.73 nm f=0.0517 <S\*\*2>=1.115

160A -> 165A 0.14938  
161A -> 165A 0.59782  
162A -> 165A -0.34627  
164A -> 165A 0.65553

This state for optimization and/or second-order correction.

Total Energy, E(TD-HF/TD-DFT) = -2834.12194056

Copying the excited state density for this state as the 1-particle RhoCI density.

Excited State 2: 2.423-A 2.1267 eV 582.99 nm f=0.0194 <S\*\*2>=1.218

160A -> 165A -0.38871  
161A -> 165A -0.57364  
164A -> 165A 0.65608  
164A -> 167A 0.13048

164B -> 166B 0.11431

Excited State 3: 2.122-A 2.2566 eV 549.43 nm f=0.0015 <S\*\*2>=0.876

153A -> 165A -0.11794

154A -> 165A -0.13484

159A -> 165A 0.49934

160A -> 165A -0.16641

161A -> 165A 0.32811

162A -> 165A 0.64367

164A -> 165A 0.15017

Excited State 4: 3.586-A 2.3303 eV 532.06 nm f=0.0035 <S\*\*2>=2.965

163A -> 167A -0.11480

164A -> 165A -0.18899

164A -> 166A -0.19140

164A -> 167A 0.62534

162B -> 166B -0.11873

164B -> 165B 0.11817

164B -> 166B 0.64651

Excited State 5: 2.365-A 2.6555 eV 466.90 nm f=0.0062 <S\*\*2>=1.148

152A -> 170A -0.10307

153A -> 170A -0.13196

154A -> 167A -0.10560

154A -> 170A -0.23377

157A -> 170A 0.18088

159A -> 167A -0.10260

159A -> 168A -0.10234

159A -> 169A -0.10362

159A -> 170A -0.24395

162A -> 167A -0.26699

162A -> 168A -0.23259

162A -> 169A -0.21751

162A -> 170A -0.52050

162A -> 171A 0.16791

162A -> 172A 0.14481

162A -> 173A 0.13358

164A -> 170A 0.12090

Excited State 6: 2.577-A 2.7942 eV 443.73 nm f=0.2143 <S\*\*2>=1.411

135A -> 165A -0.12204

146A -> 165A 0.10571

155A -> 165A -0.10783

157A -> 165A -0.11272

|              |          |
|--------------|----------|
| 158A -> 165A | 0.66019  |
| 160A -> 165A | -0.39283 |
| 161A -> 166A | -0.13869 |
| 162A -> 165A | -0.18630 |
| 163A -> 165A | -0.11680 |
| 164A -> 165A | -0.18081 |
| 159B -> 165B | 0.10711  |
| 160B -> 165B | 0.23601  |
| 163B -> 165B | -0.17710 |

Excited State 7: 3.443-A 3.0393 eV 407.94 nm f=0.0182 <S\*\*2>=2.713

|              |          |
|--------------|----------|
| 143A -> 168A | -0.12545 |
| 145A -> 169A | 0.10334  |
| 151A -> 169A | -0.15678 |
| 155A -> 168A | -0.15536 |
| 156A -> 169A | -0.12816 |
| 157A -> 166A | -0.11053 |
| 157A -> 168A | 0.12116  |
| 157A -> 169A | 0.23216  |
| 158A -> 165A | 0.13424  |
| 160A -> 168A | 0.16906  |
| 160A -> 169A | -0.12429 |
| 161A -> 168A | -0.10939 |
| 162A -> 166A | -0.12006 |
| 162A -> 168A | 0.14725  |
| 162A -> 169A | 0.20615  |
| 162A -> 170A | -0.10877 |
| 163A -> 167A | -0.15824 |
| 164A -> 168A | -0.10635 |
| 151B -> 170B | -0.19034 |
| 155B -> 169B | -0.15988 |
| 155B -> 170B | 0.14520  |
| 156B -> 165B | 0.10024  |
| 156B -> 169B | 0.15498  |
| 156B -> 170B | 0.14328  |
| 156B -> 172B | -0.12678 |
| 159B -> 170B | -0.11095 |
| 162B -> 166B | -0.14761 |

Excited State 8: 3.546-A 3.1825 eV 389.59 nm f=0.0087 <S\*\*2>=2.893

|              |          |
|--------------|----------|
| 163A -> 166A | -0.13026 |
| 163A -> 167A | 0.46272  |
| 163A -> 169A | -0.11062 |
| 163A -> 173A | -0.14143 |

164A -> 168A -0.13424  
164A -> 171A 0.11133  
164A -> 173A -0.27304  
162B -> 166B 0.47547  
163B -> 165B -0.14541  
164B -> 166B 0.23575  
164B -> 167B 0.13387  
164B -> 171B -0.18926  
164B -> 173B 0.23177

Excited State 9: 2.534-A 3.1895 eV 388.72 nm f=0.0126 <S\*\*2>=1.355

161A -> 166A -0.14550  
164A -> 167A -0.23748  
160B -> 165B 0.16833  
163B -> 165B 0.81427  
164B -> 165B 0.22321  
164B -> 166B 0.21898

Excited State 10: 2.478-A 3.2876 eV 377.12 nm f=0.1554 <S\*\*2>=1.285

163A -> 167A 0.12492  
164A -> 166A -0.24611  
164A -> 167A 0.58823  
162B -> 166B 0.11535  
163B -> 165B 0.29744  
164B -> 166B -0.58497

Excited State 11: 2.495-A 3.3346 eV 371.81 nm f=0.0055 <S\*\*2>=1.306

143A -> 169A -0.10046  
152A -> 169A 0.14386  
153A -> 169A 0.16646  
154A -> 169A 0.19394  
159A -> 169A 0.21569  
162A -> 166A -0.26535  
162A -> 168A -0.32200  
162A -> 169A 0.56536  
162A -> 171A 0.10326  
164A -> 166A 0.10143  
164A -> 167A 0.15272  
164A -> 168A 0.13689  
164A -> 169A -0.25537  
164B -> 166B -0.10771

Excited State 12: 2.299-A 3.3917 eV 365.55 nm f=0.0036 <S\*\*2>=1.072

147A -> 165A 0.11928

149A -> 165A -0.10569  
151A -> 165A -0.19677  
153A -> 165A 0.28062  
154A -> 165A 0.31060  
154A -> 168A 0.12205  
159A -> 165A -0.35014  
159A -> 168A 0.12448  
162A -> 165A 0.47395  
162A -> 166A -0.10745  
162A -> 168A 0.29531  
162A -> 170A -0.13084  
162A -> 171A 0.11163  
163A -> 165A -0.17175

Excited State 13: 2.460-A 3.4191 eV 362.62 nm f=0.0019 <S\*\*2>=1.263

151A -> 168A -0.13108  
153A -> 165A -0.18224  
154A -> 165A -0.16856  
154A -> 168A 0.21713  
157A -> 165A 0.10140  
159A -> 165A 0.20360  
159A -> 168A 0.23336  
162A -> 165A -0.27758  
162A -> 168A 0.53448  
162A -> 169A 0.12056  
162A -> 170A -0.17451  
162A -> 172A 0.11533  
164A -> 168A -0.15157  
160B -> 165B -0.10610

Excited State 14: 2.527-A 3.5884 eV 345.51 nm f=0.0025 <S\*\*2>=1.346

153A -> 165A 0.13319  
157A -> 165A -0.27855  
160A -> 165A 0.11097  
161A -> 166A -0.14032  
163A -> 165A 0.80742  
160B -> 165B 0.16186

Excited State 15: 2.557-A 3.6482 eV 339.85 nm f=0.0066 <S\*\*2>=1.384

160A -> 169A -0.11187  
163A -> 167A -0.12996  
164A -> 166A -0.11679  
159B -> 167B -0.22854  
160B -> 167B 0.13309

161B -> 167B 0.11674  
162B -> 166B -0.11083  
164B -> 165B -0.11433  
164B -> 167B 0.81724

Excited State 16: 3.152-A 3.7564 eV 330.06 nm f=0.0105 <S\*\*2>=2.234

150A -> 169A -0.11458  
154A -> 169A 0.12769  
155A -> 169A 0.11434  
157A -> 168A -0.21162  
157A -> 169A -0.16744  
158A -> 165A -0.12597  
159A -> 169A 0.14866  
160A -> 166A 0.13357  
160A -> 169A -0.25189  
161A -> 166A -0.16559  
161A -> 169A 0.13651  
162A -> 169A 0.12492  
163A -> 165A -0.20809  
164A -> 166A -0.24165  
164A -> 167A -0.10077  
164A -> 169A 0.25517  
160B -> 165B 0.12392  
163B -> 165B -0.16509  
163B -> 168B 0.13797  
164B -> 165B 0.22829  
164B -> 167B -0.24180

Excited State 17: 3.191-A 3.8058 eV 325.77 nm f=0.0093 <S\*\*2>=2.296

150A -> 168A -0.10442  
151A -> 169A -0.11771  
152A -> 169A -0.12812  
153A -> 169A -0.11810  
154A -> 165A 0.11435  
155A -> 168A 0.13486  
156A -> 169A -0.10986  
157A -> 165A -0.11687  
157A -> 168A -0.16379  
157A -> 169A 0.24434  
158A -> 165A 0.13355  
159A -> 168A 0.12739  
160A -> 165A -0.12898  
160A -> 166A 0.11586  
160A -> 168A -0.22756

|              |          |
|--------------|----------|
| 161A -> 166A | 0.18572  |
| 161A -> 168A | 0.14161  |
| 162A -> 166A | -0.10678 |
| 163A -> 165A | 0.24061  |
| 163A -> 169A | -0.12254 |
| 164A -> 168A | 0.20157  |
| 164A -> 169A | 0.11376  |
| 156B -> 170B | 0.10975  |
| 159B -> 165B | -0.11972 |
| 160B -> 165B | -0.22807 |
| 163B -> 165B | 0.12646  |
| 163B -> 168B | -0.19581 |

Excited State 18: 3.178-A 3.8440 eV 322.54 nm f=0.0118 <S\*\*2>=2.275

|              |          |
|--------------|----------|
| 150A -> 168A | -0.10033 |
| 152A -> 168A | -0.11924 |
| 153A -> 165A | -0.10741 |
| 153A -> 168A | -0.10454 |
| 157A -> 166A | -0.10822 |
| 157A -> 169A | 0.29327  |
| 158A -> 165A | -0.24194 |
| 158A -> 166A | -0.10764 |
| 160A -> 168A | -0.17842 |
| 161A -> 166A | -0.20924 |
| 161A -> 169A | -0.15715 |
| 163A -> 165A | -0.15274 |
| 164A -> 168A | 0.20955  |
| 164A -> 169A | -0.17882 |
| 159B -> 165B | 0.12453  |
| 160B -> 165B | 0.28623  |
| 163B -> 165B | -0.16546 |
| 163B -> 168B | 0.27631  |

Excited State 19: 3.110-A 3.9719 eV 312.15 nm f=0.0034 <S\*\*2>=2.168

|              |          |
|--------------|----------|
| 149A -> 169A | -0.17819 |
| 152A -> 169A | -0.10190 |
| 154A -> 165A | -0.22645 |
| 155A -> 165A | -0.12719 |
| 155A -> 169A | -0.14487 |
| 156A -> 165A | -0.17623 |
| 157A -> 165A | 0.35370  |
| 157A -> 168A | 0.19378  |
| 158A -> 169A | -0.24213 |
| 160A -> 165A | 0.12866  |

|              |          |
|--------------|----------|
| 160A -> 168A | -0.10058 |
| 162A -> 169A | 0.12806  |
| 163A -> 165A | 0.22470  |
| 164A -> 166A | -0.20041 |
| 164A -> 169A | 0.14442  |
| 160B -> 165B | 0.12633  |
| 164B -> 165B | 0.22609  |

Excited State 20: 3.519-A 3.9931 eV 310.50 nm f=0.0002 <S\*\*2>=2.846

|              |          |
|--------------|----------|
| 158A -> 168A | -0.11233 |
| 163A -> 167A | 0.28294  |
| 164A -> 168A | 0.25903  |
| 164A -> 169A | 0.14748  |
| 164A -> 170A | 0.16711  |
| 164A -> 171A | -0.20388 |
| 164A -> 173A | 0.37886  |
| 162B -> 166B | 0.31614  |
| 164B -> 165B | -0.16121 |
| 164B -> 171B | 0.31608  |
| 164B -> 172B | 0.13103  |
| 164B -> 173B | -0.28872 |

Excited State 21: 3.000-A 4.0474 eV 306.33 nm f=0.0014 <S\*\*2>=2.000

|              |          |
|--------------|----------|
| 146A -> 165A | -0.14603 |
| 147A -> 165A | 0.24514  |
| 149A -> 168A | 0.14652  |
| 149A -> 169A | -0.13977 |
| 152A -> 168A | 0.10059  |
| 154A -> 165A | 0.28017  |
| 155A -> 165A | 0.26708  |
| 155A -> 169A | -0.12552 |
| 156A -> 165A | 0.14549  |
| 157A -> 165A | -0.17768 |
| 157A -> 168A | 0.21821  |
| 158A -> 168A | 0.24380  |
| 158A -> 169A | -0.17398 |
| 159A -> 165A | 0.18285  |
| 160A -> 165A | -0.12662 |
| 164A -> 168A | -0.22769 |
| 164A -> 169A | 0.11627  |
| 164A -> 170A | 0.11648  |
| 164A -> 173A | 0.11623  |
| 152B -> 170B | 0.10452  |
| 163B -> 168B | 0.11933  |

Excited State 22: 2.767-A 4.0534 eV 305.88 nm f=0.0126 <S\*\*2>=1.665

|              |          |
|--------------|----------|
| 161A -> 166A | 0.10632  |
| 164A -> 166A | 0.17681  |
| 164A -> 167A | 0.11391  |
| 164A -> 169A | -0.14664 |
| 164A -> 173A | 0.10021  |
| 159B -> 165B | -0.17832 |
| 163B -> 165B | -0.10794 |
| 164B -> 165B | 0.77637  |
| 164B -> 166B | -0.15072 |
| 164B -> 167B | 0.18270  |
| 164B -> 169B | 0.18225  |
| 164B -> 170B | 0.13938  |
| 164B -> 173B | -0.11936 |

Excited State 23: 3.051-A 4.1013 eV 302.30 nm f=0.0024 <S\*\*2>=2.078

|              |          |
|--------------|----------|
| 149A -> 165A | 0.24022  |
| 149A -> 168A | 0.20078  |
| 152A -> 165A | 0.13786  |
| 152A -> 168A | 0.16534  |
| 153A -> 168A | 0.10823  |
| 154A -> 165A | -0.18193 |
| 155A -> 168A | 0.16729  |
| 156A -> 165A | -0.14656 |
| 157A -> 165A | 0.30573  |
| 157A -> 169A | 0.15920  |
| 158A -> 165A | 0.15210  |
| 158A -> 166A | -0.12417 |
| 158A -> 168A | 0.25632  |
| 158A -> 169A | 0.15302  |
| 160A -> 165A | 0.13823  |
| 164A -> 166A | 0.15035  |
| 164A -> 168A | -0.17814 |
| 164A -> 170A | 0.10313  |
| 155B -> 169B | 0.13754  |
| 163B -> 168B | 0.10807  |

Excited State 24: 2.643-A 4.2079 eV 294.65 nm f=0.0020 <S\*\*2>=1.497

|              |          |
|--------------|----------|
| 129A -> 165A | -0.11838 |
| 130A -> 165A | -0.10907 |
| 142A -> 165A | -0.15510 |
| 143A -> 165A | -0.10621 |
| 144A -> 165A | 0.10400  |

145A -> 165A 0.13136  
146A -> 165A -0.10955  
147A -> 165A 0.45545  
148A -> 165A 0.15796  
149A -> 165A -0.12665  
152A -> 165A -0.18620  
157A -> 165A 0.42859  
163A -> 165A 0.16416  
164A -> 166A 0.25215  
164A -> 168A 0.10737  
160B -> 165B 0.14080  
163B -> 168B 0.21401

Excited State 25: 2.977-A 4.2570 eV 291.25 nm f=0.0009 <S\*\*2>=1.965

142A -> 165A 0.17651  
146A -> 165A 0.14787  
147A -> 165A -0.30852  
149A -> 165A 0.16251  
150A -> 165A -0.10083  
151A -> 165A -0.13514  
152A -> 169A -0.13263  
153A -> 169A -0.10980  
156A -> 165A -0.13260  
157A -> 165A -0.15314  
158A -> 169A -0.12337  
162A -> 166A -0.10594  
164A -> 166A 0.45669  
164A -> 167A 0.13566  
164A -> 170A 0.22074  
164A -> 173A -0.11357  
163B -> 168B 0.11287

**Mono-oxidized [CrN(Sal)<sup>OiPr</sup>]<sup>+</sup>, singlet:**

Excited State 1: 2.345-A 0.8273 eV 1498.66 nm f=0.0670

161A -> 165A -0.17869  
164A -> 165A 0.97405

This state for optimization and/or second-order correction.

Total Energy, E(TD-HF/TD-DFT) = -2834.14173997

Copying the excited state density for this state as the 1-particle RhoCI density.

Excited State 2: 2.371-A 1.5197 eV 815.86 nm f=0.0070

160A -> 165A -0.67176  
161A -> 165A 0.68369

Excited State 3: 1.936-A 1.7213 eV 720.30 nm f=0.0083

|              |          |
|--------------|----------|
| 158A -> 165A | 0.20322  |
| 159A -> 165A | 0.48075  |
| 160A -> 165A | -0.17666 |
| 161A -> 165A | -0.20630 |
| 162A -> 165A | 0.69744  |
| 163A -> 165A | -0.18280 |

Excited State 4: 3.639-A 2.0291 eV 611.04 nm f=0.0005

|              |          |
|--------------|----------|
| 164A -> 167A | -0.66070 |
| 164A -> 169A | -0.13253 |
| 164A -> 170A | 0.11169  |
| 164B -> 166B | 0.67110  |

Excited State 5: 2.496-A 2.4056 eV 515.40 nm f=0.2092

|              |          |
|--------------|----------|
| 152A -> 165A | 0.10056  |
| 158A -> 165A | 0.61709  |
| 159A -> 165A | -0.34806 |
| 160A -> 165A | 0.34069  |
| 161A -> 165A | 0.26742  |
| 161A -> 166A | -0.11734 |
| 162A -> 165A | 0.24663  |
| 159B -> 165B | -0.15306 |
| 160B -> 165B | 0.19821  |

Excited State 6: 2.365-A 2.6560 eV 466.81 nm f=0.0041

|              |          |
|--------------|----------|
| 147A -> 165A | 0.12681  |
| 151A -> 165A | 0.15194  |
| 152A -> 165A | 0.11867  |
| 152A -> 170A | -0.12787 |
| 153A -> 165A | 0.14628  |
| 155A -> 165A | 0.18888  |
| 156A -> 165A | -0.16714 |
| 156A -> 170A | 0.12368  |
| 157A -> 165A | 0.11042  |
| 158A -> 165A | -0.22571 |
| 158A -> 168A | -0.11456 |
| 158A -> 170A | -0.14749 |
| 158A -> 171A | 0.11287  |
| 158A -> 172A | 0.11490  |
| 159A -> 168A | -0.12399 |
| 159A -> 170A | -0.16029 |
| 159A -> 171A | 0.14134  |

|              |          |
|--------------|----------|
| 159A -> 172A | 0.13429  |
| 162A -> 166A | 0.14859  |
| 162A -> 167A | -0.12963 |
| 162A -> 168A | -0.22770 |
| 162A -> 169A | -0.12329 |
| 162A -> 170A | -0.29023 |
| 162A -> 171A | 0.23199  |
| 162A -> 172A | 0.22740  |

Excited State 7: 2.396-A 2.8740 eV 431.39 nm f=0.0276

|              |          |
|--------------|----------|
| 147A -> 165A | 0.11970  |
| 149A -> 165A | -0.12387 |
| 151A -> 165A | 0.23721  |
| 153A -> 165A | 0.19603  |
| 155A -> 165A | 0.32386  |
| 156A -> 165A | -0.11241 |
| 157A -> 165A | 0.15016  |
| 158A -> 165A | -0.24671 |
| 159A -> 165A | -0.21614 |
| 159A -> 166A | -0.11077 |
| 160A -> 165A | 0.14776  |
| 161A -> 165A | 0.12104  |
| 162A -> 165A | 0.49707  |
| 162A -> 166A | -0.12905 |
| 162A -> 169A | 0.10160  |
| 162A -> 170A | 0.10220  |
| 162A -> 171A | -0.15392 |
| 163A -> 165A | -0.14896 |

Excited State 8: 2.385-A 2.9579 eV 419.17 nm f=0.0541

|              |          |
|--------------|----------|
| 156A -> 165A | -0.14457 |
| 163A -> 165A | 0.50017  |
| 164A -> 166A | 0.14872  |
| 164A -> 167A | 0.52778  |
| 164B -> 165B | 0.24839  |
| 164B -> 166B | 0.50377  |

Excited State 9: 3.197-A 3.0027 eV 412.91 nm f=0.0157

|              |          |
|--------------|----------|
| 150A -> 168A | -0.13489 |
| 154A -> 169A | 0.11165  |
| 155A -> 168A | -0.15649 |
| 156A -> 169A | 0.15121  |
| 159A -> 165A | 0.16821  |
| 160A -> 168A | -0.12802 |

|              |          |
|--------------|----------|
| 161A -> 166A | -0.10792 |
| 161A -> 168A | -0.11728 |
| 161A -> 169A | 0.15419  |
| 162A -> 169A | 0.10275  |
| 163A -> 165A | 0.39134  |
| 164A -> 166A | 0.11887  |
| 164A -> 167A | -0.13959 |
| 164A -> 168A | 0.13507  |
| 164A -> 169A | -0.20721 |
| 150B -> 170B | -0.10174 |
| 151B -> 170B | -0.11026 |
| 154B -> 170B | -0.12359 |
| 156B -> 169B | 0.15401  |
| 160B -> 169B | 0.11300  |
| 162B -> 165B | 0.15989  |
| 164B -> 165B | -0.24802 |
| 164B -> 166B | -0.12567 |
| 164B -> 169B | -0.10396 |

Excited State 10: 2.659-A 3.0262 eV 409.71 nm f=0.0465

|              |          |
|--------------|----------|
| 154A -> 165A | -0.10296 |
| 156A -> 165A | -0.19598 |
| 156A -> 169A | -0.10344 |
| 161A -> 166A | 0.12580  |
| 161A -> 169A | -0.10891 |
| 162A -> 165A | 0.16253  |
| 163A -> 165A | 0.59410  |
| 164A -> 166A | -0.18181 |
| 164A -> 167A | -0.35752 |
| 164B -> 166B | -0.33872 |
| 164B -> 167B | -0.11787 |

Excited State 11: 2.680-A 3.1104 eV 398.61 nm f=0.0092

|              |          |
|--------------|----------|
| 163A -> 167A | 0.13083  |
| 164A -> 173A | 0.18454  |
| 159B -> 167B | -0.13316 |
| 160B -> 165B | -0.10138 |
| 160B -> 167B | -0.14685 |
| 162B -> 165B | -0.15980 |
| 163B -> 166B | -0.12490 |
| 164B -> 165B | 0.36895  |
| 164B -> 166B | -0.25202 |
| 164B -> 167B | 0.63589  |
| 164B -> 168B | 0.27683  |

164B -> 173B 0.13957  
164B -> 174B -0.10713

Excited State 12: 3.492-A 3.1672 eV 391.46 nm f=0.0041

163A -> 165A 0.15677  
163A -> 167A 0.26994  
163A -> 173A 0.11475  
164A -> 166A 0.14239  
164A -> 168A -0.13331  
164A -> 171A 0.17741  
164A -> 173A 0.42229  
162B -> 165B 0.13714  
163B -> 166B -0.28425  
164B -> 165B -0.29988  
164B -> 167B -0.14388  
164B -> 170B 0.10488  
164B -> 171B -0.20508  
164B -> 172B 0.13150  
164B -> 173B 0.29929  
164B -> 174B -0.25760

Excited State 13: 2.927-A 3.2181 eV 385.27 nm f=0.0124

151A -> 165A 0.15050  
152A -> 165A -0.12938  
154A -> 165A 0.18224  
156A -> 165A 0.22077  
158A -> 165A -0.13950  
160A -> 168A 0.11340  
161A -> 166A -0.18201  
162A -> 165A 0.11756  
162A -> 168A -0.12083  
163A -> 165A 0.13131  
163A -> 167A -0.12475  
164A -> 166A 0.15990  
164A -> 168A -0.12834  
164A -> 173A -0.11905  
160B -> 165B 0.15215  
162B -> 165B 0.24938  
163B -> 166B 0.10518  
164B -> 165B -0.21442  
164B -> 167B 0.45964  
164B -> 168B 0.11849

Excited State 14: 2.655-A 3.2884 eV 377.04 nm f=0.0307

|              |          |
|--------------|----------|
| 156A -> 165A | 0.18751  |
| 160A -> 166A | -0.13231 |
| 164A -> 166A | 0.59719  |
| 164A -> 167A | -0.18433 |
| 164A -> 168A | -0.16086 |
| 164A -> 169A | -0.33602 |
| 164A -> 171A | 0.11421  |
| 162B -> 165B | -0.32313 |
| 164B -> 165B | 0.23950  |
| 164B -> 166B | -0.15388 |
| 164B -> 167B | -0.21373 |

Excited State 15: 2.880-A 3.3208 eV 373.36 nm f=0.0018

|              |          |
|--------------|----------|
| 143A -> 165A | 0.10631  |
| 150A -> 165A | 0.10691  |
| 151A -> 165A | 0.10935  |
| 152A -> 165A | -0.25672 |
| 154A -> 165A | 0.27497  |
| 156A -> 165A | 0.43759  |
| 158A -> 165A | -0.12405 |
| 159A -> 165A | 0.11029  |
| 160A -> 165A | 0.11963  |
| 161A -> 165A | 0.20849  |
| 162A -> 168A | -0.10432 |
| 163A -> 165A | 0.15510  |
| 164A -> 166A | -0.29466 |
| 164A -> 168A | 0.20883  |
| 164A -> 169A | 0.18023  |
| 164B -> 165B | 0.35803  |
| 164B -> 167B | -0.17924 |

**Bis-oxidized [CrN(Sal)<sup>OiPr</sup>]<sup>+</sup>, doublet:**

Excited State 1: 2.987-A 2.0245 eV 612.43 nm f=0.0077 <S\*\*2>=1.980

|              |          |
|--------------|----------|
| 163A -> 165A | -0.12707 |
| 161B -> 164B | 0.17008  |
| 162B -> 164B | 0.93331  |

This state for optimization and/or second-order correction.

Total Energy, E(TD-HF/TD-DFT) = -2833.64893010

Copying the excited state density for this state as the 1-particle RhoCI density.

Excited State 2: 2.986-A 2.0710 eV 598.66 nm f=0.0144 <S\*\*2>=1.978

|              |         |
|--------------|---------|
| 161A -> 165A | 0.18056 |
| 162A -> 165A | 0.15000 |

163A -> 165A 0.91617  
164A -> 165A -0.10205  
162B -> 164B 0.12703

Excited State 3: 2.835-A 2.6220 eV 472.87 nm f=0.0396 <S\*\*2>=1.759

153A -> 171A 0.10409  
154A -> 170A 0.10899  
154A -> 171A 0.13528  
156A -> 165A -0.16683  
159A -> 165A 0.28656  
160A -> 165A 0.11729  
161A -> 165A 0.69962  
161A -> 167A 0.18199  
161A -> 170A 0.18250  
161A -> 171A 0.23205

Excited State 4: 3.044-A 2.6921 eV 460.55 nm f=0.4163 <S\*\*2>=2.067

160A -> 165A 0.56823  
162A -> 165A -0.12892  
162A -> 166A -0.17155  
163A -> 167A -0.12379  
164A -> 165A -0.32438  
164A -> 166A 0.10177  
160B -> 164B -0.44323  
161B -> 165B 0.17890  
162B -> 166B 0.11864  
163B -> 164B -0.28226  
163B -> 165B 0.12489

Excited State 5: 2.931-A 2.7705 eV 447.52 nm f=0.0102 <S\*\*2>=1.898

150A -> 170A -0.12196  
150A -> 171A -0.12998  
153A -> 170A -0.14818  
153A -> 171A -0.16031  
154A -> 170A -0.19231  
154A -> 171A -0.20718  
156A -> 165A -0.11470  
159A -> 165A 0.19620  
161A -> 165A 0.38647  
161A -> 166A 0.14332  
161A -> 167A -0.11888  
161A -> 168A 0.11190  
161A -> 170A -0.35373  
161A -> 171A -0.36656

161A -> 172A 0.16237  
163A -> 171A 0.10154

Excited State 6: 2.990-A 2.7851 eV 445.16 nm f=0.0036 <S\*\*2>=1.985

160A -> 165A 0.44625  
162A -> 165A -0.11552  
162A -> 166A 0.21613  
164A -> 165A -0.29920  
160B -> 164B 0.53393  
161B -> 164B -0.10716  
161B -> 165B 0.16086  
162B -> 166B -0.13054  
163B -> 164B 0.39413

Excited State 7: 2.960-A 2.8729 eV 431.57 nm f=0.0019 <S\*\*2>=1.941

140B -> 164B 0.15805  
154B -> 164B 0.15378  
156B -> 164B -0.22585  
158B -> 164B 0.17042  
159B -> 164B 0.84667  
159B -> 166B 0.13198  
163B -> 164B 0.15256

Excited State 8: 2.712-A 2.9912 eV 414.49 nm f=0.0217 <S\*\*2>=1.589

160A -> 165A -0.13879  
162A -> 166A -0.10593  
164A -> 165A -0.45448  
164A -> 166A 0.24989  
157B -> 164B 0.10212  
159B -> 164B -0.10460  
160B -> 164B -0.31413  
163B -> 164B 0.59840  
163B -> 165B -0.14579

Excited State 9: 3.274-A 3.0036 eV 412.79 nm f=0.0006 <S\*\*2>=2.430

148A -> 168A -0.14752  
149A -> 169A -0.15809  
155A -> 168A 0.11182  
155A -> 169A -0.11765  
160A -> 168A -0.10492  
162A -> 166A -0.14647  
164A -> 165A 0.32936  
164A -> 166A -0.18215  
148B -> 170B 0.11674

149B -> 169B 0.12964  
153B -> 169B 0.11381  
159B -> 164B -0.10209  
160B -> 164B -0.13735  
162B -> 166B 0.10077  
163B -> 164B 0.52197  
163B -> 165B -0.15326

Excited State 10: 3.052-A 3.0420 eV 407.58 nm f=0.0519 <S\*\*2>=2.079

148A -> 168A 0.11533  
149A -> 169A 0.11778  
160A -> 165A 0.32331  
160A -> 168A 0.10062  
164A -> 165A 0.60550  
160B -> 164B -0.17122  
161B -> 165B 0.10066  
163B -> 164B 0.21291  
163B -> 165B 0.16890

Excited State 11: 3.151-A 3.1450 eV 394.22 nm f=0.0273 <S\*\*2>=2.232

163A -> 167A 0.15142  
164A -> 166A 0.27639  
161B -> 165B -0.19543  
163B -> 164B 0.15686  
163B -> 165B 0.81510  
163B -> 166B -0.13180

Excited State 12: 3.164-A 3.1783 eV 390.10 nm f=0.0783 <S\*\*2>=2.253

162A -> 166A 0.20450  
164A -> 165A 0.25333  
164A -> 166A 0.78587  
164A -> 167A -0.10005  
162B -> 166B -0.17390  
163B -> 165B -0.26495

Excited State 13: 3.225-A 3.5839 eV 345.94 nm f=0.0007 <S\*\*2>=2.350

147A -> 169A -0.14115  
149A -> 168A 0.14325  
150A -> 168A 0.10261  
150A -> 169A -0.12133  
153A -> 168A 0.11482  
154A -> 167A 0.11661  
154A -> 168A 0.22029  
154A -> 169A -0.19230

|              |          |
|--------------|----------|
| 157A -> 169A | 0.14600  |
| 160A -> 168A | 0.16281  |
| 161A -> 167A | 0.23744  |
| 161A -> 168A | 0.39268  |
| 161A -> 169A | -0.34308 |
| 161A -> 170A | 0.13236  |
| 162A -> 168A | -0.13301 |
| 163A -> 167A | -0.16061 |
| 163A -> 168A | -0.11030 |
| 163A -> 169A | 0.13087  |
| 164A -> 167A | 0.12949  |
| 164A -> 169A | -0.16864 |

Excited State 14: 3.234-A 3.6108 eV 343.37 nm f=0.0028 <S\*\*2>=2.365

|              |          |
|--------------|----------|
| 148A -> 168A | -0.16130 |
| 149A -> 169A | 0.14922  |
| 150A -> 168A | 0.12351  |
| 150A -> 169A | 0.11241  |
| 153A -> 168A | 0.11077  |
| 153A -> 169A | 0.10021  |
| 154A -> 168A | 0.19684  |
| 154A -> 169A | 0.23719  |
| 157A -> 168A | -0.11537 |
| 160A -> 169A | 0.12444  |
| 161A -> 166A | -0.12445 |
| 161A -> 168A | 0.41023  |
| 161A -> 169A | 0.42379  |
| 162A -> 169A | -0.13108 |
| 163A -> 168A | -0.19268 |
| 163A -> 169A | -0.14059 |
| 164A -> 168A | 0.17224  |

Excited State 15: 3.510-A 3.7346 eV 331.98 nm f=0.0388 <S\*\*2>=2.830

|              |          |
|--------------|----------|
| 147A -> 168A | 0.12181  |
| 147A -> 169A | -0.10476 |
| 148A -> 169A | -0.11966 |
| 149A -> 169A | 0.11505  |
| 153A -> 168A | -0.14719 |
| 155A -> 169A | 0.12881  |
| 157A -> 169A | 0.10676  |
| 158A -> 168A | -0.12005 |
| 160A -> 168A | -0.10737 |
| 161A -> 168A | -0.18606 |
| 161A -> 169A | -0.16452 |

|              |          |
|--------------|----------|
| 162A -> 166A | 0.31556  |
| 164A -> 166A | -0.22833 |
| 164A -> 167A | 0.10173  |
| 164A -> 168A | 0.17299  |
| 164A -> 169A | -0.12335 |
| 164A -> 170A | -0.14033 |
| 164A -> 171A | 0.12246  |
| 148B -> 169B | 0.11560  |
| 149B -> 164B | -0.11648 |
| 153B -> 164B | -0.16019 |
| 160B -> 164B | -0.21741 |
| 160B -> 166B | -0.12369 |
| 161B -> 165B | -0.11378 |
| 162B -> 166B | -0.25241 |

Excited State 16: 3.468-A 3.7556 eV 330.14 nm f=0.0190 <S\*\*2>=2.757

|              |          |
|--------------|----------|
| 148A -> 168A | -0.10199 |
| 148A -> 169A | 0.17763  |
| 153A -> 168A | -0.17376 |
| 154A -> 168A | -0.10119 |
| 155A -> 168A | 0.17906  |
| 160A -> 165A | -0.22287 |
| 160A -> 167A | -0.16489 |
| 160A -> 169A | 0.14981  |
| 161A -> 165A | 0.12756  |
| 161A -> 167A | -0.11315 |
| 161A -> 168A | -0.22529 |
| 162A -> 165A | 0.10459  |
| 163A -> 167A | -0.25072 |
| 161B -> 165B | 0.32195  |
| 163B -> 165B | 0.21940  |
| 163B -> 168B | -0.29404 |

Excited State 17: 3.570-A 3.8314 eV 323.60 nm f=0.0236 <S\*\*2>=2.937

|              |          |
|--------------|----------|
| 147A -> 169A | 0.14174  |
| 148A -> 168A | 0.12624  |
| 149A -> 169A | -0.11923 |
| 153A -> 168A | 0.11266  |
| 155A -> 168A | -0.13189 |
| 157A -> 169A | -0.13199 |
| 160A -> 165A | -0.15009 |
| 160A -> 168A | 0.10340  |
| 160A -> 169A | -0.10390 |
| 161A -> 168A | 0.11017  |

|              |          |
|--------------|----------|
| 162A -> 166A | 0.29780  |
| 162A -> 167A | -0.11989 |
| 162A -> 169A | 0.11930  |
| 163A -> 167A | -0.12673 |
| 164A -> 166A | -0.21079 |
| 164A -> 170A | -0.29404 |
| 164A -> 171A | 0.13087  |
| 164A -> 172A | -0.11002 |
| 160B -> 164B | -0.23802 |
| 161B -> 165B | 0.20155  |
| 162B -> 166B | -0.22762 |
| 163B -> 168B | -0.17063 |

Excited State 18: 3.636-A 3.8472 eV 322.27 nm f=0.0147 <S\*\*2>=3.055

|              |          |
|--------------|----------|
| 147A -> 168A | -0.16811 |
| 148A -> 169A | 0.20857  |
| 149A -> 168A | 0.16100  |
| 153A -> 169A | 0.16676  |
| 155A -> 167A | 0.11284  |
| 155A -> 168A | 0.11240  |
| 155A -> 169A | -0.23982 |
| 157A -> 168A | 0.15854  |
| 160A -> 165A | 0.14997  |
| 160A -> 168A | 0.11486  |
| 160A -> 169A | 0.12957  |
| 161A -> 169A | 0.15002  |
| 162A -> 166A | 0.10250  |
| 162A -> 168A | -0.11855 |
| 163A -> 167A | 0.18015  |
| 164A -> 170A | -0.11815 |
| 149B -> 169B | 0.10902  |
| 161B -> 165B | -0.23216 |
| 163B -> 165B | -0.11615 |
| 163B -> 168B | 0.20528  |

Excited State 19: 3.526-A 3.9705 eV 312.26 nm f=0.0007 <S\*\*2>=2.858

|              |          |
|--------------|----------|
| 147A -> 169A | 0.10815  |
| 148A -> 167A | -0.15674 |
| 148A -> 168A | -0.19046 |
| 148A -> 169A | 0.20363  |
| 149A -> 165A | -0.16045 |
| 150A -> 165A | -0.18100 |
| 151A -> 169A | -0.12697 |
| 153A -> 165A | -0.13695 |

|              |          |
|--------------|----------|
| 153A -> 167A | 0.12612  |
| 153A -> 169A | -0.26966 |
| 154A -> 165A | -0.15050 |
| 155A -> 165A | -0.11754 |
| 155A -> 169A | 0.11612  |
| 156A -> 165A | -0.16761 |
| 158A -> 167A | 0.10624  |
| 158A -> 169A | -0.20374 |
| 159A -> 165A | 0.23066  |
| 161A -> 165A | -0.20001 |
| 161A -> 167A | 0.10951  |
| 161A -> 169A | -0.11753 |
| 162A -> 165A | 0.11807  |
| 164A -> 169A | 0.11068  |
| 148B -> 169B | -0.10394 |
| 148B -> 170B | 0.11108  |

Excited State 20: 3.058-A 4.0119 eV 309.04 nm f=0.0008 <S\*\*2>=2.087

|              |          |
|--------------|----------|
| 133A -> 165A | 0.10964  |
| 148A -> 167A | 0.10293  |
| 148A -> 168A | 0.12806  |
| 148A -> 169A | -0.17602 |
| 149A -> 165A | -0.14336 |
| 150A -> 165A | -0.32760 |
| 153A -> 165A | -0.29705 |
| 153A -> 169A | 0.13865  |
| 154A -> 165A | -0.20709 |
| 156A -> 165A | -0.33701 |
| 158A -> 169A | 0.11568  |
| 159A -> 165A | 0.33890  |
| 161A -> 165A | -0.26994 |
| 161A -> 169A | 0.10608  |
| 161A -> 172A | -0.10724 |
| 163B -> 168B | -0.11790 |

Excited State 21: 3.740-A 4.0411 eV 306.81 nm f=0.0047 <S\*\*2>=3.247

|              |          |
|--------------|----------|
| 142A -> 168A | 0.10360  |
| 147A -> 168A | -0.13306 |
| 148A -> 165A | 0.16937  |
| 148A -> 168A | -0.35735 |
| 148A -> 169A | -0.21692 |
| 148A -> 170A | -0.12252 |
| 151A -> 168A | 0.13762  |
| 153A -> 168A | 0.25408  |

|              |          |
|--------------|----------|
| 153A -> 169A | 0.11948  |
| 154A -> 168A | -0.15783 |
| 157A -> 165A | 0.11236  |
| 158A -> 168A | 0.23490  |
| 158A -> 169A | 0.13067  |
| 160A -> 168A | -0.17821 |
| 164A -> 168A | -0.17893 |
| 148B -> 164B | 0.16269  |
| 148B -> 169B | -0.14180 |
| 148B -> 170B | -0.16637 |

Excited State 22: 2.971-A 4.1130 eV 301.44 nm f=0.0006 <S\*\*2>=1.957

|              |          |
|--------------|----------|
| 133B -> 164B | 0.17504  |
| 135B -> 164B | 0.20206  |
| 140B -> 164B | 0.15395  |
| 143B -> 164B | -0.10530 |
| 146B -> 164B | -0.21682 |
| 147B -> 164B | -0.35106 |
| 148B -> 164B | -0.11471 |
| 149B -> 164B | -0.16443 |
| 150B -> 164B | -0.24087 |
| 151B -> 164B | -0.11659 |
| 152B -> 164B | -0.37350 |
| 154B -> 164B | -0.22611 |
| 155B -> 164B | 0.25213  |
| 156B -> 164B | 0.39868  |
| 157B -> 164B | 0.10388  |
| 158B -> 164B | -0.12233 |
| 159B -> 164B | 0.14197  |
| 161B -> 164B | 0.10206  |

Excited State 23: 2.925-A 4.1970 eV 295.41 nm f=0.0011 <S\*\*2>=1.889

|              |          |
|--------------|----------|
| 133A -> 165A | -0.15050 |
| 135A -> 165A | -0.12884 |
| 146A -> 165A | -0.29199 |
| 148A -> 165A | 0.12111  |
| 149A -> 165A | 0.23105  |
| 150A -> 165A | 0.27222  |
| 151A -> 165A | 0.13000  |
| 154A -> 165A | -0.32065 |
| 156A -> 165A | 0.35539  |
| 157A -> 165A | 0.15551  |
| 158A -> 165A | 0.12569  |
| 159A -> 165A | 0.45069  |

161A -> 165A -0.16692  
163B -> 167B 0.14659

Excited State 24: 2.972-A 4.2369 eV 292.63 nm f=0.0370 <S\*\*2>=1.958

162A -> 166A 0.10277  
164A -> 169A -0.11315  
164A -> 170A -0.20685  
164A -> 171A 0.14214  
149B -> 164B 0.14685  
150B -> 167B -0.10051  
153B -> 164B 0.30501  
153B -> 167B -0.11635  
154B -> 164B 0.16194  
155B -> 167B -0.14834  
160B -> 166B 0.12054  
163B -> 166B 0.19953  
163B -> 167B 0.51363  
163B -> 168B 0.12445

Excited State 25: 2.940-A 4.2646 eV 290.73 nm f=0.0063 <S\*\*2>=1.911

164A -> 168A -0.14408  
164A -> 170A 0.22524  
164A -> 171A -0.13858  
149B -> 164B -0.19548  
153B -> 164B -0.35107  
154B -> 164B -0.11687  
155B -> 167B -0.16300  
156B -> 164B -0.17353  
160B -> 167B 0.13851  
161B -> 164B 0.28867  
163B -> 166B 0.11635  
163B -> 167B 0.49108

**Bis-oxidized [CrN(Sal)<sup>OiPr</sup>]<sup>+</sup>, quartet:**

Excited State 1: 4.105-A 2.0230 eV 612.88 nm f=0.0064 <S\*\*2>=3.962

161B -> 163B 0.33779  
161B -> 164B 0.44722  
162B -> 163B 0.66168  
162B -> 164B 0.40909

This state for optimization and/or second-order correction.

Total Energy, E(TD-HF/TD-DFT) = -2833.64826313

Copying the excited state density for this state as the 1-particle RhoCI density.

Excited State 2: 4.105-A 2.0681 eV 599.52 nm f=0.0118 <S\*\*2>=3.964

161B -> 163B 0.59451  
161B -> 164B -0.47706  
162B -> 163B -0.29278  
162B -> 164B 0.50002

Excited State 3: 4.090-A 2.7010 eV 459.03 nm f=0.0886 <S\*\*2>=3.931

150A -> 170A -0.13840  
150A -> 172A -0.13383  
153A -> 170A -0.13889  
153A -> 172A -0.13037  
154A -> 170A -0.21310  
154A -> 172A -0.19917  
158A -> 170A 0.10646  
161A -> 167A 0.19739  
161A -> 168A 0.12095  
161A -> 170A -0.40681  
161A -> 171A -0.16913  
161A -> 172A -0.35332  
161A -> 173A 0.12650  
162A -> 167A -0.14867  
162A -> 170A 0.12623  
162A -> 172A 0.14795  
158B -> 164B -0.12264  
159B -> 164B 0.11517  
160B -> 163B -0.22129

Excited State 4: 4.209-A 2.7716 eV 447.34 nm f=0.3909 <S\*\*2>=4.179

161A -> 167A 0.12108  
161A -> 170A -0.10839  
161A -> 172A -0.14298  
162A -> 167A 0.15157  
162A -> 170A 0.11024  
163A -> 166A 0.19269  
164A -> 167A 0.11286  
165A -> 166A 0.11347  
157B -> 164B 0.21530  
158B -> 164B 0.29850  
159B -> 164B -0.30223  
160B -> 163B 0.61137  
160B -> 164B -0.14369  
161B -> 166B -0.12165  
162B -> 165B -0.13093

Excited State 5: 4.403-A 2.8001 eV 442.78 nm  $f=0.0076$   $\langle S^{*2} \rangle=4.596$

|              |          |
|--------------|----------|
| 149A -> 169A | 0.10897  |
| 162A -> 166A | 0.21776  |
| 163A -> 167A | 0.21008  |
| 165A -> 168A | 0.10308  |
| 147B -> 168B | 0.14405  |
| 149B -> 169B | -0.10510 |
| 157B -> 163B | 0.25483  |
| 158B -> 163B | 0.35588  |
| 158B -> 164B | 0.13747  |
| 159B -> 163B | -0.24361 |
| 160B -> 164B | 0.51136  |
| 161B -> 165B | -0.13318 |
| 162B -> 166B | -0.12694 |

Excited State 6: 4.114-A 2.8704 eV 431.94 nm  $f=0.0094$   $\langle S^{*2} \rangle=3.981$

|              |          |
|--------------|----------|
| 140B -> 163B | 0.13607  |
| 140B -> 164B | 0.11469  |
| 154B -> 163B | 0.11983  |
| 155B -> 163B | -0.11816 |
| 156B -> 163B | -0.12783 |
| 156B -> 164B | -0.10290 |
| 158B -> 163B | 0.42084  |
| 158B -> 164B | 0.35918  |
| 159B -> 163B | 0.51002  |
| 159B -> 164B | 0.39881  |

Excited State 7: 4.136-A 2.9399 eV 421.74 nm  $f=0.0157$   $\langle S^{*2} \rangle=4.028$

|              |          |
|--------------|----------|
| 154B -> 163B | 0.10382  |
| 154B -> 164B | -0.12130 |
| 155B -> 163B | -0.17921 |
| 155B -> 164B | 0.18140  |
| 157B -> 163B | -0.48319 |
| 157B -> 164B | 0.54482  |
| 157B -> 165B | 0.10094  |
| 158B -> 163B | 0.24894  |
| 158B -> 164B | -0.18539 |
| 159B -> 163B | -0.19717 |
| 159B -> 164B | 0.14309  |

Excited State 8: 4.619-A 2.9629 eV 418.45 nm  $f=0.0048$   $\langle S^{*2} \rangle=5.085$

|              |          |
|--------------|----------|
| 147A -> 168A | 0.16035  |
| 149A -> 168A | -0.11859 |
| 149A -> 169A | 0.16756  |

151A -> 168A -0.11296  
155A -> 168A -0.14289  
155A -> 169A 0.11953  
159A -> 168A 0.17079  
159A -> 169A 0.10183  
162A -> 169A -0.14400  
164A -> 166A -0.13073  
165A -> 167A -0.18249  
165A -> 168A 0.13785  
147B -> 164B 0.10778  
147B -> 168B 0.22260  
148B -> 163B 0.10163  
149B -> 165B 0.10625  
149B -> 169B -0.15979  
153B -> 165B 0.10315  
153B -> 168B -0.12332  
153B -> 169B -0.13562  
157B -> 163B -0.23640  
157B -> 164B 0.13385  
158B -> 163B -0.12493  
159B -> 163B 0.16331  
160B -> 164B -0.25331  
160B -> 168B 0.13159

Excited State 9: 4.247-A 3.0982 eV 400.18 nm f=0.0073 <S\*\*2>=4.259

162A -> 167A -0.13719  
163A -> 166A -0.15548  
164A -> 166A -0.13973  
164A -> 167A 0.50477  
165A -> 166A 0.70989  
165A -> 167A -0.14191  
161B -> 166B 0.11674  
162B -> 165B 0.13083

Excited State 10: 4.278-A 3.1689 eV 391.25 nm f=0.1006 <S\*\*2>=4.324

162A -> 166A -0.14507  
163A -> 167A -0.15332  
164A -> 166A 0.54111  
164A -> 167A 0.23952  
165A -> 167A 0.62897  
161B -> 165B 0.12007  
162B -> 166B 0.14923

Excited State 11: 4.272-A 3.5608 eV 348.19 nm f=0.0047 <S\*\*2>=4.313

|              |          |
|--------------|----------|
| 147A -> 168A | 0.11594  |
| 150A -> 169A | -0.13434 |
| 151A -> 169A | -0.12627 |
| 154A -> 169A | -0.26334 |
| 156A -> 169A | 0.10545  |
| 158A -> 169A | 0.14014  |
| 159A -> 168A | 0.12698  |
| 159A -> 169A | 0.12055  |
| 161A -> 166A | 0.19897  |
| 161A -> 169A | -0.50722 |
| 161A -> 171A | -0.14690 |
| 162A -> 166A | -0.14391 |
| 162A -> 169A | 0.25100  |
| 163A -> 169A | -0.12825 |
| 165A -> 168A | 0.12476  |
| 165A -> 169A | 0.24169  |

Excited State 12: 4.278-A 3.5691 eV 347.39 nm f=0.0003 <S\*\*2>=4.325

|              |          |
|--------------|----------|
| 147A -> 169A | 0.11497  |
| 149A -> 168A | 0.10927  |
| 149A -> 169A | 0.10634  |
| 150A -> 168A | 0.14408  |
| 153A -> 168A | 0.12435  |
| 154A -> 168A | 0.25208  |
| 156A -> 168A | -0.15209 |
| 157A -> 168A | 0.10320  |
| 158A -> 168A | -0.13605 |
| 159A -> 169A | 0.14386  |
| 161A -> 168A | 0.53662  |
| 161A -> 170A | 0.15365  |
| 162A -> 168A | -0.27254 |
| 163A -> 168A | 0.12163  |
| 164A -> 167A | 0.11590  |
| 165A -> 168A | -0.20440 |
| 165A -> 169A | 0.14303  |

Excited State 13: 4.524-A 3.7113 eV 334.07 nm f=0.0182 <S\*\*2>=4.866

|              |          |
|--------------|----------|
| 147A -> 168A | -0.15150 |
| 147A -> 169A | 0.11590  |
| 149A -> 169A | 0.13063  |
| 150A -> 168A | -0.15430 |
| 153A -> 168A | -0.20348 |
| 153A -> 170A | -0.10584 |
| 154A -> 168A | -0.15512 |

|              |          |
|--------------|----------|
| 155A -> 168A | 0.18081  |
| 158A -> 169A | 0.11486  |
| 159A -> 166A | -0.11218 |
| 159A -> 168A | -0.16305 |
| 159A -> 169A | 0.15242  |
| 161A -> 168A | -0.31945 |
| 162A -> 166A | 0.11300  |
| 163A -> 166A | 0.13252  |
| 163A -> 167A | 0.10289  |
| 164A -> 167A | 0.18660  |
| 165A -> 168A | -0.15449 |
| 165A -> 169A | 0.18890  |
| 147B -> 168B | -0.13647 |
| 149B -> 169B | -0.10286 |
| 162B -> 165B | -0.12509 |

Excited State 14: 4.523-A 3.7470 eV 330.89 nm f=0.0122 <S\*\*2>=4.865

|              |          |
|--------------|----------|
| 147A -> 169A | -0.12327 |
| 148A -> 168A | 0.10922  |
| 149A -> 168A | -0.19764 |
| 149A -> 169A | 0.15003  |
| 150A -> 169A | -0.15832 |
| 153A -> 168A | 0.10853  |
| 153A -> 169A | -0.12175 |
| 154A -> 169A | -0.18082 |
| 155A -> 166A | -0.10652 |
| 155A -> 168A | -0.15966 |
| 155A -> 169A | 0.19084  |
| 161A -> 166A | 0.14016  |
| 161A -> 169A | -0.26695 |
| 162A -> 166A | 0.17560  |
| 163A -> 167A | 0.15287  |
| 164A -> 166A | 0.12254  |
| 164A -> 171A | -0.11083 |
| 165A -> 167A | 0.12663  |
| 165A -> 168A | -0.13489 |
| 165A -> 169A | -0.13585 |
| 165A -> 172A | -0.11766 |
| 147B -> 169B | 0.12768  |
| 149B -> 168B | -0.11827 |
| 153B -> 168B | -0.10219 |
| 160B -> 164B | -0.16786 |
| 161B -> 165B | -0.17451 |
| 162B -> 166B | -0.13592 |

Excited State 15: 4.530-A 3.8011 eV 326.18 nm f=0.0280 <S\*\*2>=4.880

|              |          |
|--------------|----------|
| 147A -> 168A | 0.10616  |
| 159A -> 168A | 0.10983  |
| 161A -> 168A | 0.10350  |
| 162A -> 167A | 0.27559  |
| 163A -> 166A | 0.26883  |
| 163A -> 167A | 0.17485  |
| 164A -> 166A | 0.12028  |
| 164A -> 167A | 0.14317  |
| 164A -> 168A | -0.12601 |
| 164A -> 170A | 0.21654  |
| 164A -> 172A | -0.13911 |
| 165A -> 166A | 0.16613  |
| 165A -> 170A | 0.19180  |
| 165A -> 171A | -0.19207 |
| 165A -> 173A | 0.10907  |
| 159B -> 164B | 0.13857  |
| 160B -> 163B | -0.21488 |
| 161B -> 166B | -0.18797 |
| 162B -> 165B | -0.23147 |
| 162B -> 166B | -0.13207 |

Excited State 16: 4.535-A 3.8411 eV 322.79 nm f=0.0289 <S\*\*2>=4.891

|              |          |
|--------------|----------|
| 149A -> 168A | 0.13517  |
| 149A -> 169A | -0.11606 |
| 153A -> 169A | 0.14783  |
| 155A -> 168A | 0.11136  |
| 155A -> 169A | -0.16453 |
| 159A -> 168A | 0.10261  |
| 161A -> 169A | 0.14407  |
| 162A -> 166A | 0.20803  |
| 162A -> 167A | -0.13502 |
| 163A -> 166A | -0.16982 |
| 163A -> 167A | 0.21318  |
| 164A -> 166A | 0.18363  |
| 164A -> 169A | 0.13606  |
| 164A -> 171A | -0.19461 |
| 165A -> 166A | -0.11250 |
| 165A -> 170A | 0.14687  |
| 165A -> 171A | 0.23715  |
| 165A -> 172A | -0.15643 |
| 158B -> 163B | -0.10562 |
| 159B -> 163B | 0.11833  |

160B -> 163B 0.13051  
160B -> 164B -0.14160  
161B -> 165B -0.16277  
161B -> 166B 0.13239  
162B -> 165B 0.11344  
162B -> 166B -0.15457

Excited State 17: 4.722-A 3.9578 eV 313.27 nm f=0.0018 <S\*\*2>=5.324

148A -> 166A -0.14634  
148A -> 168A -0.21538  
148A -> 169A 0.27764  
153A -> 166A 0.12122  
153A -> 168A 0.19620  
153A -> 169A -0.26223  
154A -> 168A -0.12640  
154A -> 169A 0.12660  
156A -> 166A -0.10049  
156A -> 168A -0.14476  
156A -> 169A 0.20494  
157A -> 168A 0.11180  
157A -> 169A -0.16099  
163A -> 167A 0.10504  
164A -> 166A 0.13278  
164A -> 168A 0.14412  
164A -> 169A -0.19275  
164A -> 171A -0.10779  
148B -> 165B -0.16780  
148B -> 168B 0.17902  
148B -> 169B 0.19749  
149B -> 163B -0.11196  
153B -> 163B -0.13326

Excited State 18: 4.699-A 4.0185 eV 308.53 nm f=0.0139 <S\*\*2>=5.269

142A -> 168A -0.10347  
148A -> 168A 0.28054  
148A -> 169A 0.18929  
148A -> 170A 0.12425  
150A -> 168A 0.10119  
153A -> 168A -0.24437  
153A -> 169A -0.17303  
154A -> 168A 0.20806  
154A -> 169A 0.12004  
156A -> 168A 0.17170  
156A -> 169A 0.12114

|              |          |
|--------------|----------|
| 157A -> 168A | -0.14681 |
| 157A -> 169A | -0.10251 |
| 164A -> 168A | -0.22864 |
| 164A -> 169A | -0.13624 |
| 147B -> 163B | -0.18587 |
| 148B -> 164B | -0.17770 |
| 148B -> 168B | -0.22558 |
| 148B -> 169B | 0.17414  |

Excited State 19: 4.100-A 4.1073 eV 301.86 nm f=0.0006 <S\*\*2>=3.953

|              |          |
|--------------|----------|
| 132B -> 163B | -0.11409 |
| 134B -> 163B | 0.11718  |
| 135B -> 163B | 0.11002  |
| 135B -> 164B | 0.14094  |
| 140B -> 163B | 0.14101  |
| 145B -> 163B | 0.28050  |
| 145B -> 164B | 0.24120  |
| 146B -> 163B | -0.10713 |
| 147B -> 163B | 0.17598  |
| 147B -> 164B | 0.10203  |
| 149B -> 164B | -0.11950 |
| 150B -> 163B | -0.19295 |
| 150B -> 164B | -0.29270 |
| 152B -> 163B | 0.20952  |
| 152B -> 164B | 0.22127  |
| 154B -> 163B | -0.17741 |
| 155B -> 163B | 0.41858  |
| 155B -> 164B | 0.18377  |
| 156B -> 163B | 0.12455  |
| 158B -> 163B | 0.10822  |

Excited State 20: 4.090-A 4.1430 eV 299.26 nm f=0.0011 <S\*\*2>=3.932

|              |          |
|--------------|----------|
| 132B -> 164B | -0.14790 |
| 134B -> 164B | 0.11820  |
| 135B -> 163B | 0.14798  |
| 140B -> 164B | 0.10037  |
| 145B -> 163B | 0.10821  |
| 146B -> 163B | 0.24561  |
| 146B -> 164B | -0.28594 |
| 147B -> 164B | 0.14510  |
| 149B -> 163B | -0.19210 |
| 149B -> 164B | 0.13916  |
| 150B -> 163B | -0.34910 |
| 150B -> 164B | 0.24088  |

|              |          |
|--------------|----------|
| 152B -> 163B | 0.18142  |
| 154B -> 163B | 0.11506  |
| 154B -> 164B | -0.19872 |
| 155B -> 163B | -0.23535 |
| 155B -> 164B | 0.36840  |
| 156B -> 164B | 0.10198  |
| 158B -> 164B | 0.12027  |

Excited State 21: 4.285-A 4.2287 eV 293.20 nm f=0.0198 <S\*\*2>=4.339

|              |          |
|--------------|----------|
| 148A -> 169A | 0.13069  |
| 164A -> 170A | -0.20566 |
| 164A -> 171A | 0.10245  |
| 165A -> 170A | -0.16834 |
| 165A -> 172A | 0.10451  |
| 149B -> 163B | 0.20411  |
| 149B -> 164B | 0.10560  |
| 153B -> 163B | 0.29043  |
| 153B -> 164B | 0.16446  |
| 154B -> 163B | 0.28672  |
| 154B -> 164B | 0.13649  |
| 155B -> 163B | 0.11130  |
| 155B -> 164B | 0.12149  |
| 159B -> 163B | -0.10687 |
| 161B -> 163B | -0.28437 |
| 162B -> 164B | 0.29864  |

Excited State 22: 4.151-A 4.2475 eV 291.90 nm f=0.0059 <S\*\*2>=4.058

|              |          |
|--------------|----------|
| 147B -> 163B | 0.17128  |
| 150B -> 163B | 0.10162  |
| 154B -> 163B | 0.12774  |
| 158B -> 163B | -0.15118 |
| 158B -> 164B | -0.17197 |
| 159B -> 164B | 0.17567  |
| 160B -> 163B | 0.18125  |
| 160B -> 164B | 0.11171  |
| 161B -> 163B | 0.31645  |
| 161B -> 164B | 0.50142  |
| 162B -> 163B | -0.46916 |
| 162B -> 164B | -0.15671 |

Excited State 23: 4.148-A 4.2755 eV 289.99 nm f=0.0253 <S\*\*2>=4.051

|              |          |
|--------------|----------|
| 164A -> 170A | 0.10480  |
| 165A -> 169A | 0.16620  |
| 165A -> 171A | -0.12335 |

|              |          |
|--------------|----------|
| 149B -> 164B | -0.14408 |
| 152B -> 163B | 0.10486  |
| 153B -> 164B | -0.18861 |
| 154B -> 164B | -0.19808 |
| 159B -> 163B | -0.15506 |
| 159B -> 164B | 0.10392  |
| 160B -> 164B | -0.11668 |
| 161B -> 163B | -0.35258 |
| 161B -> 164B | 0.27097  |
| 162B -> 163B | -0.31402 |
| 162B -> 164B | 0.53353  |

Excited State 24: 4.292-A 4.3556 eV 284.66 nm f=0.1538 <S\*\*2>=4.355

|              |          |
|--------------|----------|
| 149A -> 168A | -0.10007 |
| 159A -> 166A | -0.12309 |
| 164A -> 167A | 0.20728  |
| 164A -> 169A | 0.13801  |
| 164A -> 170A | -0.17717 |
| 164A -> 171A | -0.15400 |
| 164A -> 172A | 0.13388  |
| 165A -> 166A | -0.10089 |
| 165A -> 171A | 0.36369  |
| 144B -> 163B | -0.16693 |
| 144B -> 164B | 0.12543  |
| 147B -> 164B | -0.10422 |
| 147B -> 167B | -0.12608 |
| 149B -> 163B | -0.10409 |
| 153B -> 163B | -0.20240 |
| 154B -> 163B | -0.13253 |
| 156B -> 163B | 0.15584  |
| 157B -> 163B | 0.17146  |
| 160B -> 163B | -0.12198 |
| 160B -> 164B | -0.15848 |
| 160B -> 167B | -0.10566 |
| 162B -> 165B | -0.11323 |

Excited State 25: 4.376-A 4.3989 eV 281.85 nm f=0.0029 <S\*\*2>=4.537

|              |          |
|--------------|----------|
| 147A -> 169A | 0.10931  |
| 148A -> 168A | 0.12569  |
| 149A -> 168A | -0.26910 |
| 149A -> 169A | -0.18761 |
| 149A -> 170A | -0.12101 |
| 153A -> 168A | 0.12765  |
| 153A -> 169A | 0.11870  |

|              |          |
|--------------|----------|
| 155A -> 168A | -0.21915 |
| 155A -> 169A | -0.19829 |
| 155A -> 170A | -0.10999 |
| 158A -> 168A | -0.10224 |
| 159A -> 168A | -0.12652 |
| 159A -> 169A | 0.13255  |
| 162A -> 168A | 0.17877  |
| 164A -> 167A | 0.16536  |
| 165A -> 166A | -0.17265 |
| 165A -> 168A | -0.16959 |
| 165A -> 169A | 0.31258  |
| 153B -> 163B | 0.15049  |
| 161B -> 163B | 0.12060  |
| 162B -> 164B | -0.15051 |

**References:**

1. Addison, A. W., Rao, T. N., Reedijk, J., Rijn, J., Verschoor, G. C. *J. Chem. Soc. Dalton Trans.* **1984**, 7, 1349-1356.
